# Supplementary material for: Lost and potentially found: the location of the “Temple of Hermes” at ancient Bubastis in the Nile Delta
Source: Copernicus journal article supplement (doi:10.5194/egqsj-73-95-2024), 2024-03-19
Supplement: Supplementary file 1 [file egqsj-73-95-2024-supplement.pdf]

Supplement of E&G Quaternary Sci. J., 73, 95–99, 2024  
<https://doi.org/10.5194/egqsj-73-95-2024-supplement>  
© Author(s) 2024. CC BY 4.0 License.

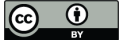

Open Access  
**E&G** Quaternary  
Science  
Journal

*Supplement of*

## **Lost and potentially found: the location of the “Temple of Hermes” at ancient Bubastis in the Nile Delta**

**Philipp Garbe et al.**

*Correspondence to:* Philipp Garbe ([philipp.garbe@uni-wuerzburg.de](mailto:philipp.garbe@uni-wuerzburg.de)) and Amr Abd El-Raouf ([ammohammed@science.zu.edu.eg](mailto:ammohammed@science.zu.edu.eg))

The copyright of individual parts of the supplement might differ from the article licence.

# Supplementary Material S1

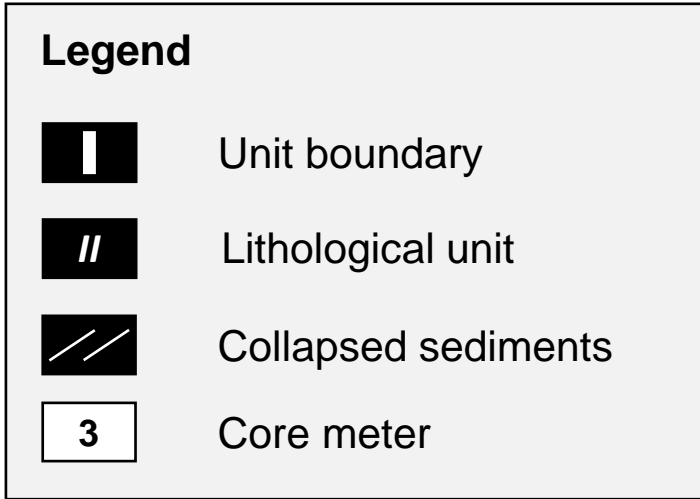

**Figure S1.** Legend for drilling photographs.

**Figure S2.** Overview of drilling locations and ERT profiles (only the solid ERT lines are used for the interpretation and discussion in the article).

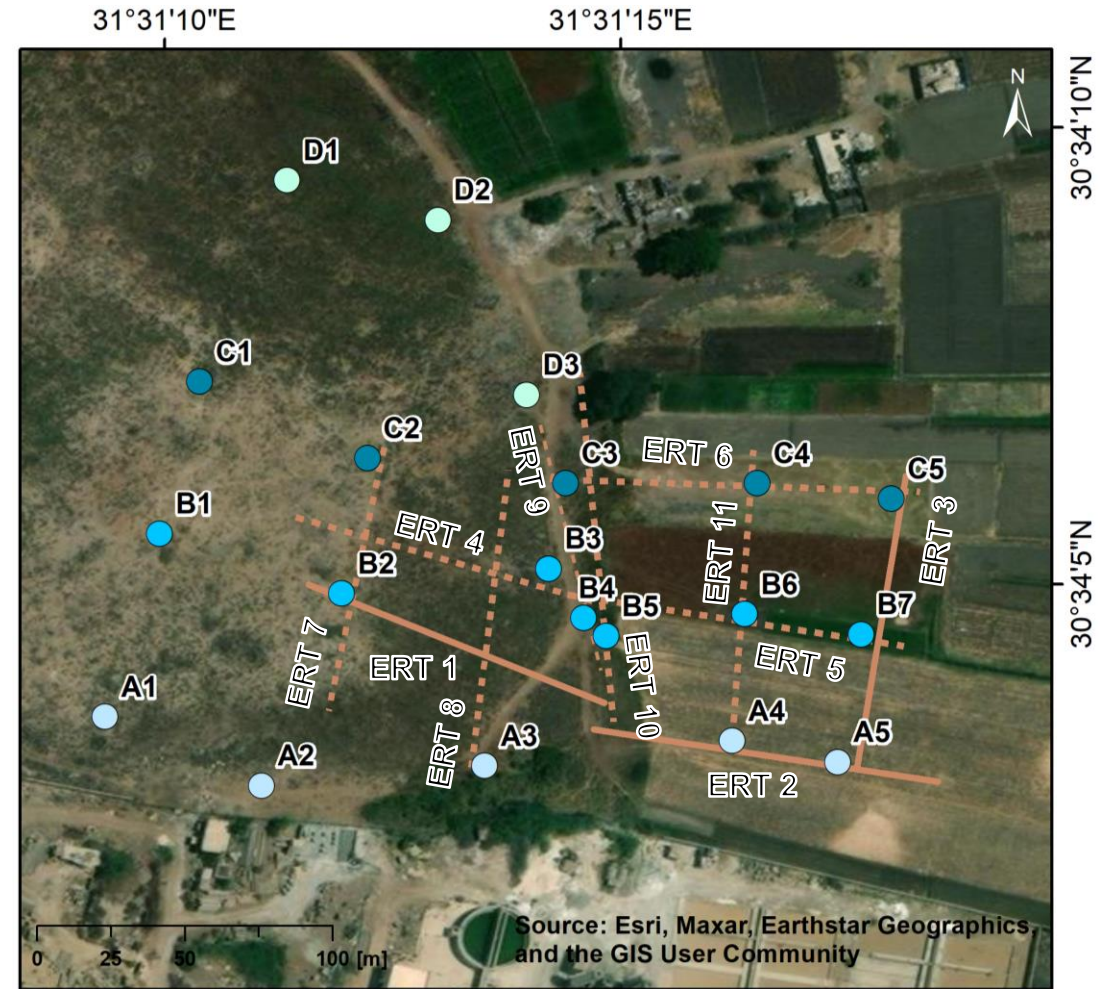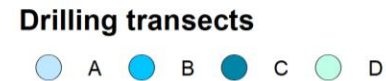

**ERT**

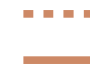

**Table S1.** General information of core A1.

|                        |                              |
|------------------------|------------------------------|
| <b>Profile number:</b> | <b>A1</b>                    |
| Date:                  | 13.03.2023                   |
| Processors:            | Philipp Garbe, Julia Meister |
| Total length [m]:      | 9.00                         |
| Height asl [m]:        | 6.779                        |
| Coordinates [UTM]:     | 0357996 3382626              |
| Location:              | Eastern Tell                 |

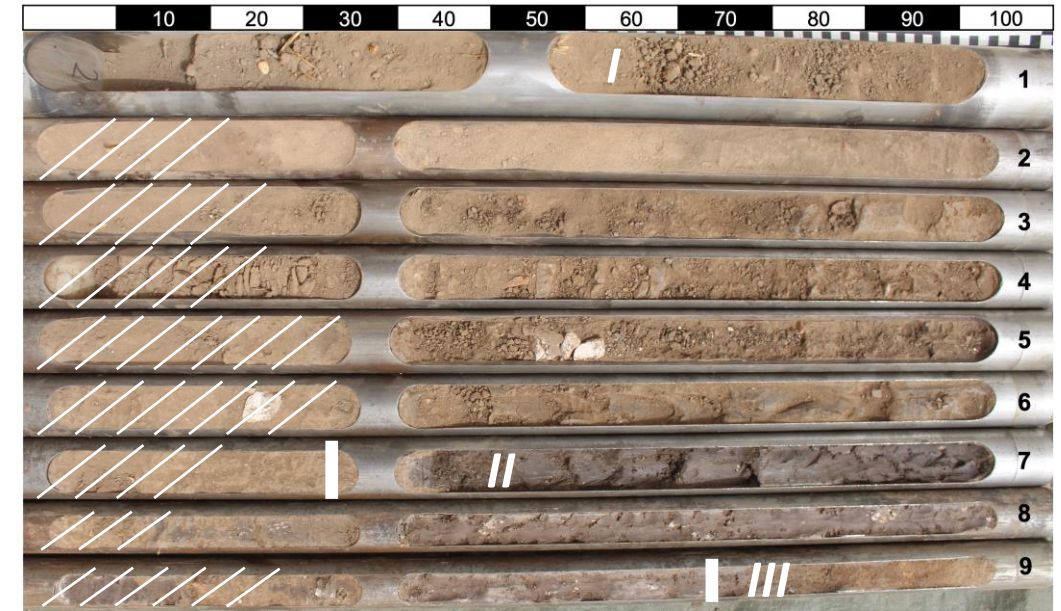

**Figure S3.** Core stratigraphy of A1 (see Figure S1 for legend).

**Table S2.** Detailed description of core A1.

| Depth from [cm] | Depth to [cm] | Horizon | Unit | Moisture (0 = dry, 5= wet) | Colour (dry) | Grain size (matrix) | Grain size (matrix)    | Cultural debris (x = present, - = not) | Remarks                                                                                                            |
|-----------------|---------------|---------|------|----------------------------|--------------|---------------------|------------------------|----------------------------------------|--------------------------------------------------------------------------------------------------------------------|
| 0               | 120           | I       | I    | 0                          | 10YR 4/3     | Uls                 | loamy sandy silt       | x                                      | root remains, little artefacts to gravel, slightly compacted                                                       |
| 120             | 170           | II      | I    | 0                          | 10YR 5/3     | Us                  | sandy silt             | x                                      | slightly compacted, very little artefacts to gravel                                                                |
| 170             | 230           | III     | I    | 0                          | 10YR 4/4     | Ut2                 | slightly clayey silt   | x                                      | moderate compacted, artefacts to gravel                                                                            |
| 230             | 620           | IV      | I    | 1                          | 10YR 3/3     | Lu                  | silty loam             | x                                      | heavily compacted, many artefacts to gravel (440cm, 500cm, 510cm) --> less to basis, limestone fragments, charcoal |
| 620             | 860           | V       | II   | 1                          | 10YR 3/2     | Lt3                 | clayey loam            | -                                      | very heavily compacted, limestone fragments, charcoal, "Bilquas-Sediment"                                          |
| 860             | 900           | VI      | III  | 3                          | 10YR 6/4     | Ss(mSgS)            | medium and coarse sand | -                                      | no artefacts                                                                                                       |

**Table S3.** General information of core A2.

|                        |                             |
|------------------------|-----------------------------|
| <b>Profile number:</b> | <b>A2</b>                   |
| Date:                  | 30.09.2023                  |
| Processors:            | Philipp Garbe, Erik Lindner |
| Total length [m]:      | 5.00                        |
| Height asl [m]:        | 5.843                       |
| Coordinates [UTM]:     | 0358042 3382597             |
| Location:              | Eastern Tell                |

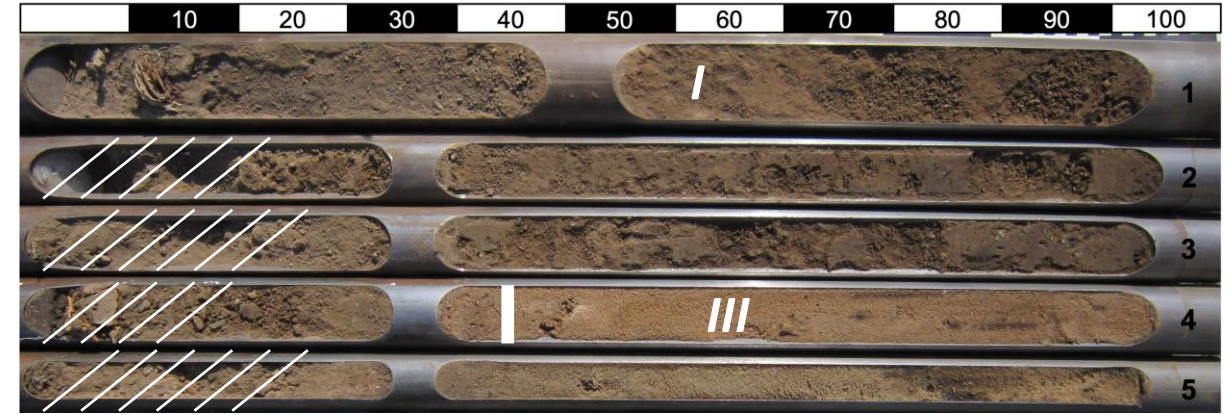

**Figure S4.** Core stratigraphy of A2 (see Figure S1 for legend).

**Table S4.** Detailed description of core A2.

| Depth from [cm] | Depth to [cm] | Horizon | Unit | Moisture (0 = dry, 5= wet) | Colour (dry) | Grain size (matrix) | Grain size (matrix)          | Cultural debris (x = present, - = not) | Remarks                                                                        |
|-----------------|---------------|---------|------|----------------------------|--------------|---------------------|------------------------------|----------------------------------------|--------------------------------------------------------------------------------|
| 0               | 140           | I       | I    | 0                          | 2,5y 5/4     | Uu                  | silty silt                   | x                                      | slightly compacted, plant remains, little artefacts to gravel                  |
| 140             | 210           | II      | I    | 1                          | 2,5y 3/2     | Su4                 | strongly silty sand          | -                                      | heavily compacted, no artefacts                                                |
| 210             | 330           | III     | I    | 1                          | 10YR 3/4     | Slu                 | loamy silty sand             | -                                      | heavily compacted, sand lens at 245cm, moderate limestone to gravel            |
| 330             | 500           | IV      | III  | 2 - 3                      | 10YR 5/6     | Ss (mSgSfS)         | medium, coarse and fine sand | -                                      | moderate compacted, Gezira, many gravels, no artefacts, clayey layers, organic |



**Table S5.** General information of core A3.

|                        |                              |
|------------------------|------------------------------|
| <b>Profile number:</b> | <b>A3</b>                    |
| Date:                  | 15.03.2023                   |
| Processors:            | Philipp Garbe, Julia Meister |
| Total length [m]:      | 7.00                         |
| Height asl [m]:        | 4.884                        |
| Coordinates [UTM]:     | 0358111 3382614              |
| Location:              | Eastern Tell                 |

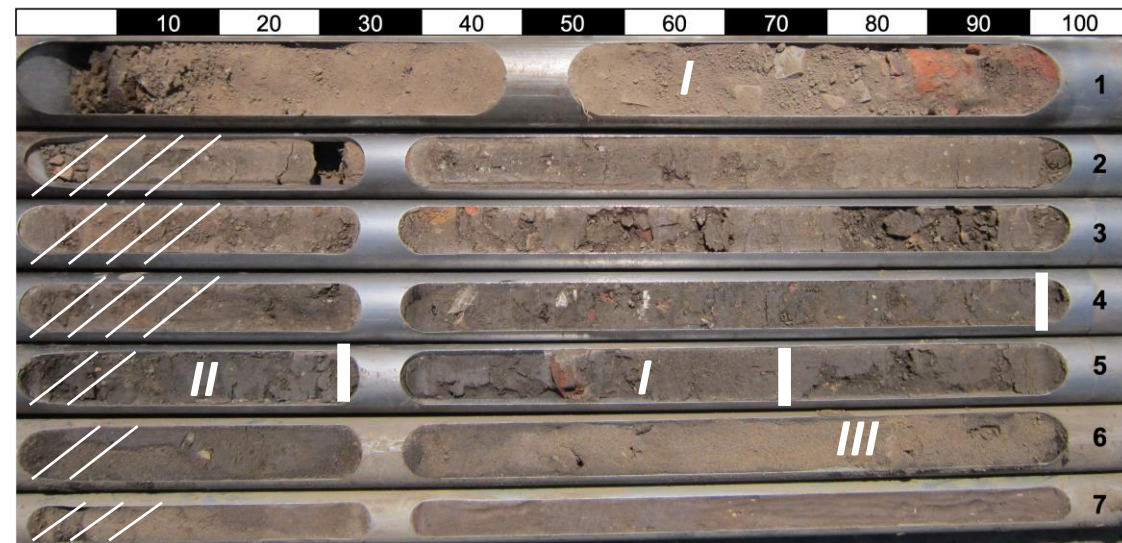

**Figure S5.** Core stratigraphy of A3 (see Figure S1 for legend).

**Table S6.** Detailed description of core A3.

| Depth from [cm] | Depth to [cm] | Horizon | Unit | Moisture (0 = dry, 5 = wet) | Colour (dry) | Grain size (matrix) | Grain size (matrix)             | Cultural debris (x = present, - = not) | Remarks                                                                                                      |
|-----------------|---------------|---------|------|-----------------------------|--------------|---------------------|---------------------------------|----------------------------------------|--------------------------------------------------------------------------------------------------------------|
| 0               | 95            | I       | I    | 0 - 1                       | 10YR 4/3     | Us                  | sandy silt                      | x                                      | root remains, slightly compacted, many artefacts to gravel (brick? 80-90cm)                                  |
| 95              | 240           | II      | I    | 0                           | 10YR 3/3     | Slu                 | loamy silty sand                | x                                      | heavily compacted, moderate artefacts to gravel, limestone fragments                                         |
| 240             | 390           | III     | I    | 1                           | 10YR 4/2     | Ut2                 | slightly clayey silt            | x                                      | heavily compacted, moderate artefacts to gravel, limestone to gravel, charcoal, oxidation features (Iron-II) |
| 390             | 420           | IV      | II   | 3                           | 10YR 3/1     | Tu2                 | slightly silty clay             | x                                      | slightly compacted, artefact fragments, limestone to gravel                                                  |
| 420             | 460           | V       | I    | 2 - 3                       | 10YR 3/1     | Lt2                 | slightly clayey loam            | x                                      | heavily compacted, charcoal, big artefact at 450cm                                                           |
| 460             | 480           | VI      | III  | 4                           | 10YR 4/2     | Ss(mSgSfS)          | medium, coarse and fine sand    | x                                      | moderate compacted, artefacts to gravel, clayey layers                                                       |
| 480             | 505           | VII     | III  | 3                           | 10YR 4/2     | Ts2 - Ss(fS)        | slightly sandy clay - fine sand | -                                      | moderate compacted, no artefacts, Geziraclay                                                                 |
| 505             | 590           | VIII    | III  | 5                           | 10YR 4/3     | Ss(gSmS)            | coarse and medium sand          | -                                      | moderate compacted, no artefacts, limestone to gravel, clayey layers (520-530cm)                             |
| 590             | 700           | IX      | III  | 3                           | 10YR 3/3     | (Lt3)               | clayey loam                     | -                                      | no artefacts, heavily compacted                                                                              |

**Table S7.** General information of core A4.

|                        |                             |
|------------------------|-----------------------------|
| <b>Profile number:</b> | <b>A4</b>                   |
| Date:                  | 08.10.2023                  |
| Processors:            | Philipp Garbe, Erik Lindner |
| Total length [m]:      | 8.00                        |
| Height asl [m]:        | 4.902                       |
| Coordinates [UTM]:     | 0358221 3382644             |
| Location:              | East of the Tell            |

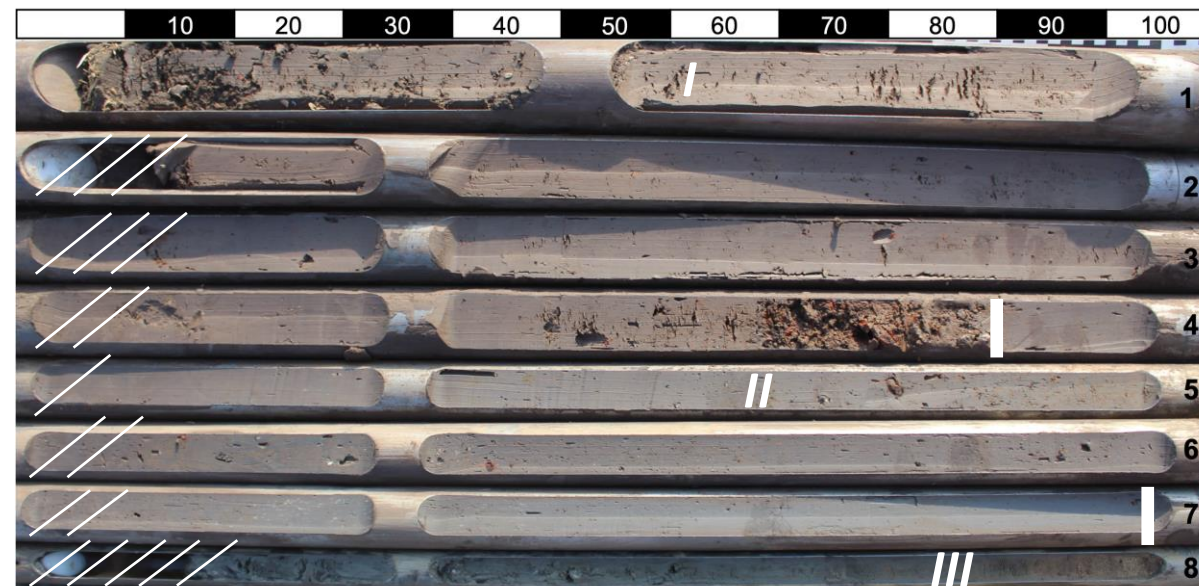

**Figure S6.** Core stratigraphy of A4 (see Figure S1 for legend).

**Table S8.** Detailed description of core A4.

| Depth from [cm] | Depth to [cm] | Horizon | Unit | Moisture (0 = dry, 5= wet) | Colour (dry) | Grain size (matrix) | Grain size (matrix)          | Cultural debris (x = present, - = not) | Remarks                                                                          |
|-----------------|---------------|---------|------|----------------------------|--------------|---------------------|------------------------------|----------------------------------------|----------------------------------------------------------------------------------|
| 0               | 350           | I       | I    | 2                          | 10YR 3/2     | Tu2                 | slightly silty clay          | x                                      | moderate compacted, plant remains, little artefacts to gravel                    |
| 350             | 380           | II      | I    | 2                          | 10YR 4/4     | Ls4                 | strongly sandy loam          | x                                      | heavily compacted, many artefacts to gravel, little limestone to gravel          |
| 380             | 700           | III     | II   | 3 - 4                      | 10YR 2/1     | Tl                  | loamy clay                   | x                                      | heavily compacted, very little artefacts to gravel, moderate limestone to gravel |
| 700             | 780           | IV      | III  | 4 - 5                      | 10YR 3/1     | Ts2                 | slightly sandy clay          | -                                      | heavily compacted, no artefacts, little limestone to gravel                      |
| 780             | 800           | V       | III  | 5                          | 10YR 5/4     | Ss (mSgSfS)         | medium, coarse and fine sand | -                                      | moderate compacted, no artefacts, clayey lenses                                  |

**Table S9.** General information of core A5.

|                        |                             |
|------------------------|-----------------------------|
| <b>Profile number:</b> | <b>A5</b>                   |
| Date:                  | 08.10.2023                  |
| Processors:            | Philipp Garbe, Erik Lindner |
| Total length [m]:      | 8.00                        |
| Height asl [m]:        | 4.939                       |
| Coordinates [UTM]:     | 0358213 3382606             |
| Location:              | East of the Tell            |

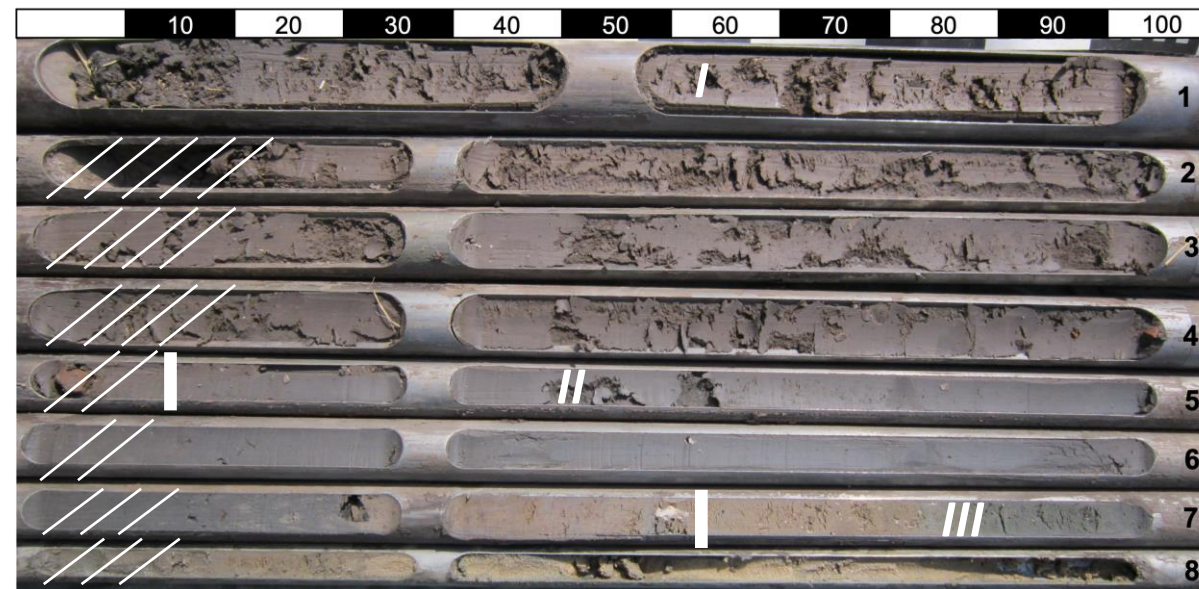

**Figure S7.** Core stratigraphy of A5 (see Figure S1 for legend).

**Table S10.** Detailed description of core A5.

| Depth from [cm] | Depth to [cm] | Horizon | Unit | Moisture (0 = dry, 5= wet) | Colour (dry) | Grain size (matrix) | Grain size (matrix)          | Cultural debris (x = present, - = not) | Remarks                                                                                |
|-----------------|---------------|---------|------|----------------------------|--------------|---------------------|------------------------------|----------------------------------------|----------------------------------------------------------------------------------------|
| 0               | 410           | I       | I    | 2                          | 10YR 3/2     | Tu3                 | silty clay                   | x                                      | slightly compacted, plant remains, little artefacts to gravel, many artefacts at basis |
| 410             | 650           | II      | II   | 3                          | 10YR 3/1     | Tl                  | loamy clay                   | x                                      | heavily compacted, very little artefacts to gravel, little limestone to gravel         |
| 650             | 730           | III     | III  | 3                          | 10YR 3/1     | Ts3                 | sandy clay                   | -                                      | heavily compacted, no artefacts                                                        |
| 730             | 800           | IV      | III  | 5                          | 10YR 6/4     | Ss (mSgSfS)         | medium, coarse and fine sand | -                                      | moderate compacted, no artefacts, gravel                                               |



**Table S11.** General information of core B1.

|                        |                            |
|------------------------|----------------------------|
| <b>Profile number:</b> | <b>B1</b>                  |
| Date:                  | 02.04.2023                 |
| Processors:            | Philipp Garbe, Martin Behl |
| Total length [m]:      | 6.00                       |
| Height asl [m]:        | 6.866                      |
| Coordinates [UTM]:     | 0358009 3382684            |
| Location:              | Eastern Tell               |

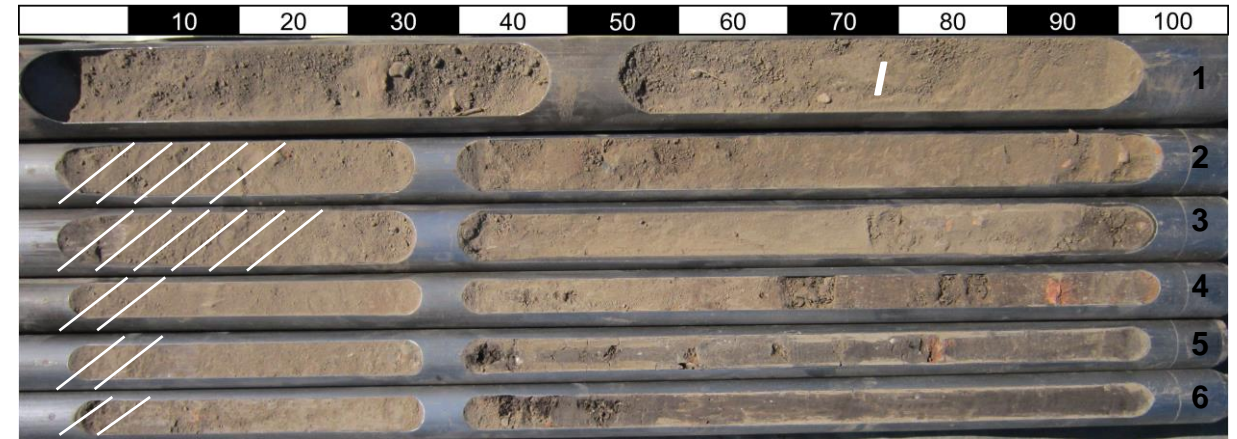

**Figure S8.** Core stratigraphy of B1 (see Figure S1 for legend).

**Table S12.** Detailed description of core B1.

| Depth from [cm] | Depth to [cm] | Horizon | Unit | Moisture (0 = dry, 5= wet) | Colour (dry) | Grain size (matrix) | Grain size (matrix)  | Cultural debris (x = present, - = not) | Remarks                                                                                 |
|-----------------|---------------|---------|------|----------------------------|--------------|---------------------|----------------------|----------------------------------------|-----------------------------------------------------------------------------------------|
| 0               | 250           | I       | I    | 0                          | 10YR 4/4     | Us                  | sandy silt           | x                                      | root remains, slightly compacted, many artefacts to gravel                              |
| 250             | 430           | II      | I    | 0                          | 10YR 4/3     | Slu                 | loamy silty sand     | x                                      | very heavily compacted, many artefacts to gravel                                        |
| 430             | 520           | III     | I    | 0 - 1                      | 10YR 3/2     | Ut2                 | slightly clayey silt | x                                      | heavily compacted, moderate artefacts to gravel, limestone fragments, charcoal at 490cm |
| 520             | 600           | IV      | I    | 1                          | 10YR 3/2     | Lt2                 | slightly clayey loam | x                                      | heavily compacted, little artefact fragments, limestone fragments, no drilling process  |



**Table S13.** General information of core B2.

|                        |                             |
|------------------------|-----------------------------|
| <b>Profile number:</b> | <b>B2</b>                   |
| Date:                  | 02.10.2023                  |
| Processors:            | Philipp Garbe, Erik Lindner |
| Total length [m]:      | 7.00                        |
| Height asl [m]:        | 6.552                       |
| Coordinates [UTM]:     | 0358069 3382667             |
| Location:              | Eastern Tell                |

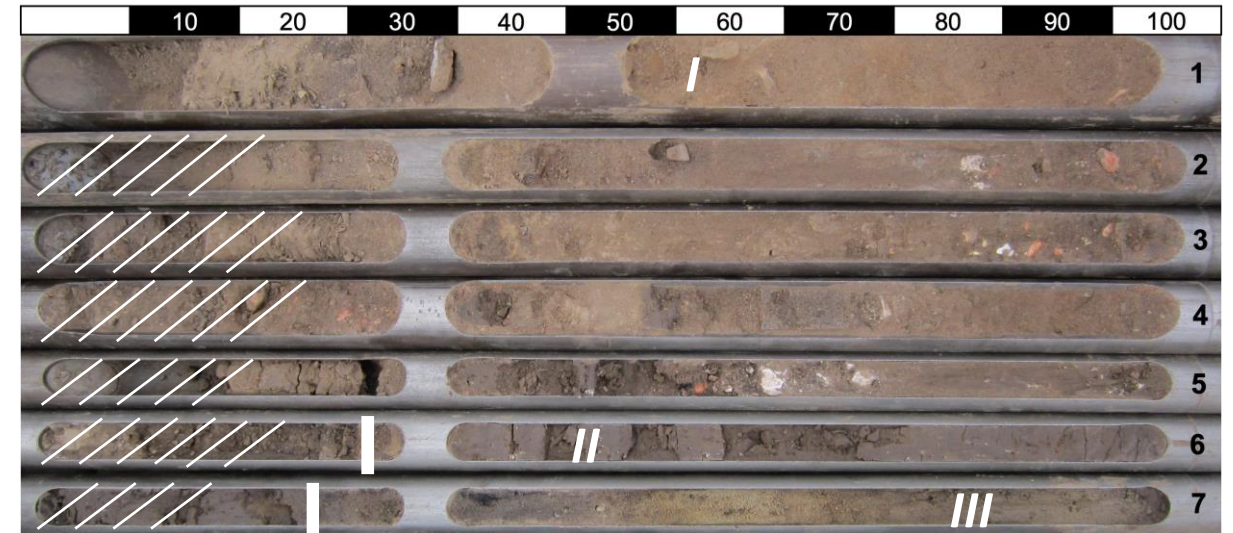

**Figure S9.** Core stratigraphy of B2 (see Figure S1 for legend).

**Table S14.** Detailed description of core B2.

| Depth from [cm] | Depth to [cm] | Horizon | Unit | Moisture (0 = dry, 5= wet) | Colour (dry) | Grain size (matrix) | Grain size (matrix)          | Cultural debris (x = present, - = not) | Remarks                                                                   |
|-----------------|---------------|---------|------|----------------------------|--------------|---------------------|------------------------------|----------------------------------------|---------------------------------------------------------------------------|
| 0               | 250           | I       | I    | 0                          | 2,5y 4/3     | Ut2                 | slightly clayey silt         | x                                      | slightly compacted, plant remains, many artefacts to gravel               |
| 250             | 430           | II      | I    | 1                          | 7,5YR 3/3    | Lu                  | silty loam                   | x                                      | heavily compacted, many artefacts to gravel, little limestone to gravel   |
| 430             | 510           | III     | I    | 2                          | 10YR 3/3     | Lt3                 | clayey loam                  | x                                      | heavily compacted, many limestone to gravel, moderate artefacts to gravel |
| 510             | 620           | IV      | II   | 3                          | 10YR 3/1     | Tu3                 | silty clay                   | -                                      | heavily compacted, limestone fragments, no artefacts                      |
| 620             | 650           | V       | III  | 3 - 4                      | 10YR 5/2     | St3                 | clayey sand                  | x                                      | heavily compacted, moderate artefacts to gravel                           |
| 650             | 700           | VI      | III  | 5                          | 10YR 5/2     | Ss (mSgSfS)         | medium, coarse and fine sand | -                                      | moderate compacted, no artefacts, gravel, clayey at 690cm                 |

**Table S15.** General information of core B3.

|                        |                            |
|------------------------|----------------------------|
| <b>Profile number:</b> | <b>B3</b>                  |
| Date:                  | 02.04.2023                 |
| Processors:            | Philipp Garbe, Martin Behl |
| Total length [m]:      | 5.00                       |
| Height asl [m]:        | 5.244                      |
| Coordinates [UTM]:     | 0358133 3382677            |
| Location:              | Eastern Tell               |

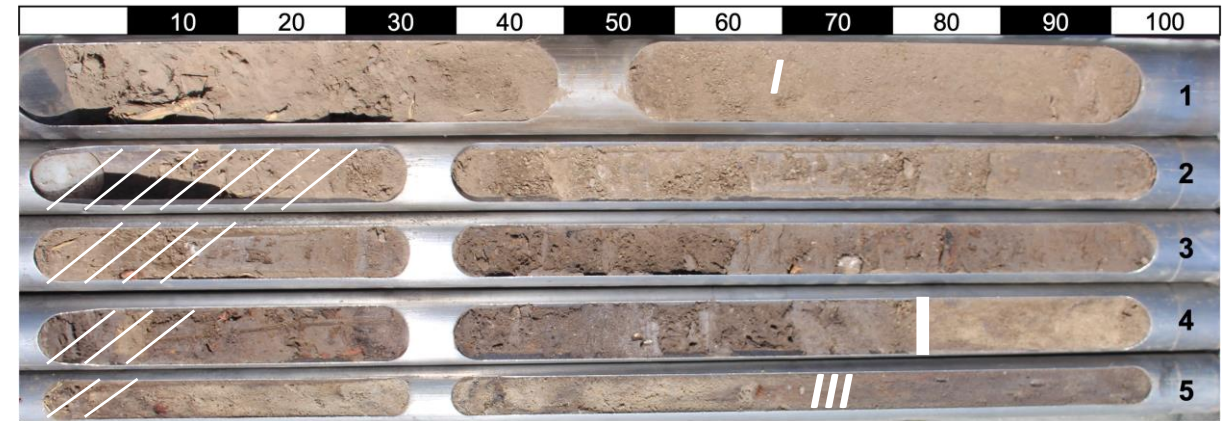

**Figure S10.** Core stratigraphy of B3 (see Figure S1 for legend).

**Table S16.** Detailed description of core B3.

| Depth from [cm] | Depth to [cm] | Horizon | Unit | Moisture (0 = dry, 5 = wet) | Colour (dry) | Grain size (matrix) | Grain size (matrix)          | Cultural debris (x = present, - = not) | Remarks                                                          |
|-----------------|---------------|---------|------|-----------------------------|--------------|---------------------|------------------------------|----------------------------------------|------------------------------------------------------------------|
| 0               | 170           | I       | I    | 0                           | 10YR 4/3     | Us                  | sandy silt                   | x                                      | root remains, slightly compacted, moderate artefacts to gravel   |
| 170             | 220           | II      | I    | 0                           | 10YR 4/3     | Slu                 | loamy silty sand             | x                                      | heavily compacted, moderate artefacts to gravel                  |
| 220             | 260           | III     | I    | 1                           | 10YR 4/3     | Lt2                 | slightly clayey loam         | x                                      | heavily compacted, many artefacts to gravel, limestone to gravel |
| 260             | 370           | IV      | I    | 1                           | 10YR 3/2     | Ls4                 | strongly sandy loam          | x                                      | heavily compacted, many artefacts to gravel, limestone to gravel |
| 370             | 500           | V       | III  | 1 - 2                       | 2,5y 5/4     | Ss(mSgSfs)          | medium, coarse and fine sand | x                                      | heavily compacted, little artefacts to gravel, clayey lenses     |

**Table S17.** General information of core B4.

|                        |                             |
|------------------------|-----------------------------|
| <b>Profile number:</b> | <b>B4</b>                   |
| Date:                  | 30.09.2023                  |
| Processors:            | Philipp Garbe, Erik Lindner |
| Total length [m]:      | 5.00                        |
| Height asl [m]:        | 5.222                       |
| Coordinates [UTM]:     | 0358136 3382651             |
| Location:              | Eastern Tell                |

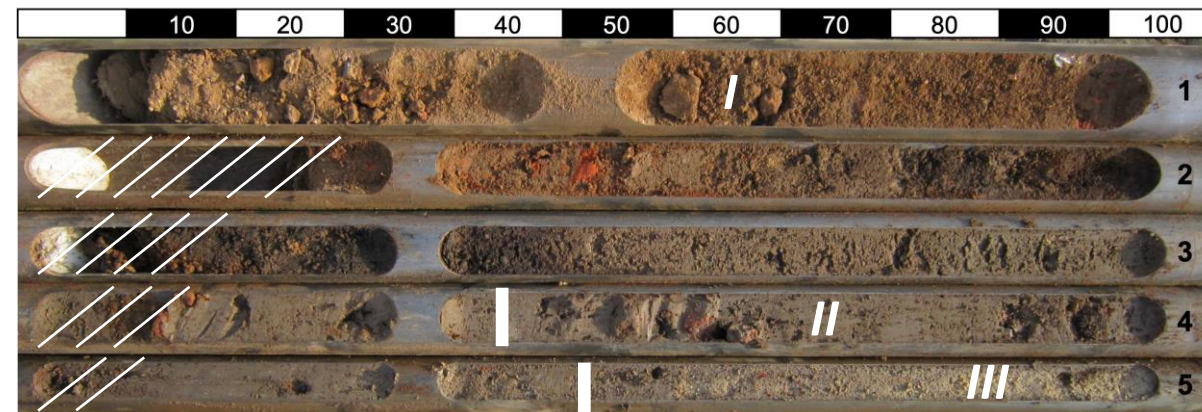

**Figure S11.** Core stratigraphy of B4 (see Figure S1 for legend).

**Table S18.** Detailed description of core B4.

| Depth from [cm] | Depth to [cm] | Horizon | Unit | Moisture (0 = dry, 5= wet) | Colour (dry) | Grain size (matrix) | Grain size (matrix)          | Cultural debris (x = present, - = not) | Remarks                                                                  |
|-----------------|---------------|---------|------|----------------------------|--------------|---------------------|------------------------------|----------------------------------------|--------------------------------------------------------------------------|
| 0               | 110           | I       | I    | 0 - 1                      | 10YR 3/6     | Uu                  | silty silt                   | x                                      | slightly compacted, plant remains, many artefacts to stone               |
| 110             | 180           | II      | I    | 1                          | 10YR 3/3     | Ut3                 | clayey silt                  | x                                      | heavily compacted, plant remains, many artefacts to gravel               |
| 180             | 240           | III     | I    | 2                          | 10YR 2/1     | Ls3                 | sandy loam                   | x                                      | heavily compacted, little artefacts to gravel                            |
| 240             | 330           | IV      | I    | 3                          | 10YR 3/3     | Lt3                 | clayey loam                  | x                                      | heavily compacted, little artefacts to gravel                            |
| 330             | 430           | V       | II   | 3                          | 10YR 3/1     | Tl                  | loamy clay                   | x                                      | heavily compacted, many artefacts to gravel, sand lens between 400-410cm |
| 430             | 500           | VI      | III  | 4                          | 2,5y 8/4     | Ss (mSgSfS)         | medium, coarse and fine sand | -                                      | moderate compacted, no artefacts, clayey layers                          |

**Table S19.** General information of core B5.

|                        |                              |
|------------------------|------------------------------|
| <b>Profile number:</b> | <b>B5</b>                    |
| Date:                  | 27.09.2023                   |
| Processors:            | Philipp Garbe, Julia Meister |
| Total length [m]:      | 6.00                         |
| Height asl [m]:        | 5.220                        |
| Coordinates [UTM]:     | 0358144 3382644              |
| Location:              | Eastern Tell                 |

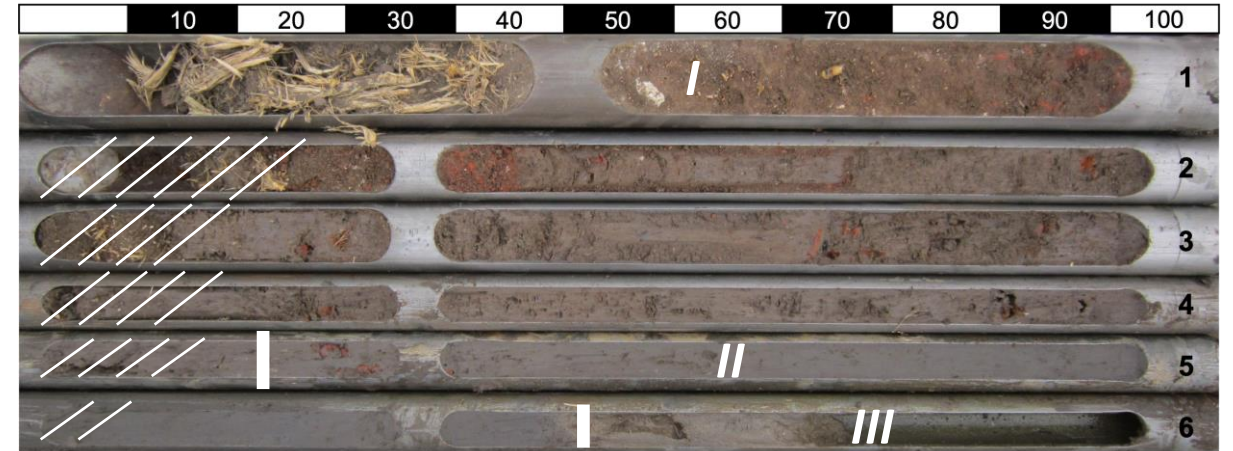

**Figure S12.** Core stratigraphy of B5 (see Figure S1 for legend).

**Table S20.** Detailed description of core B5.

| Depth from [cm] | Depth to [cm] | Horizon | Unit | Moisture (0 = dry, 5= wet) | Colour (dry) | Grain size (matrix) | Grain size (matrix)          | Cultural debris (x = present, - = not) | Remarks                                                                                        |
|-----------------|---------------|---------|------|----------------------------|--------------|---------------------|------------------------------|----------------------------------------|------------------------------------------------------------------------------------------------|
| 0               | 140           | I       | I    | 1                          | 10YR 3/6     | Su4                 | strongly silty sand          | x                                      | moderate compacted, many artefacts to gravel, many plant remains, moderate limestone to gravel |
| 140             | 220           | II      | I    | 1 - 2                      | 10YR 4/2     | Slu                 | loamy silty sand             | x                                      | heavily compacted, moderate artefacts to gravel, little limestone fragments                    |
| 220             | 280           | III     | I    | 2                          | 10YR 3/2     | Lts                 | clayey sandy loam            | x                                      | heavily compacted, moderate artefacts to gravel                                                |
| 280             | 410           | IV      | I    | 2                          | 10YR 3/2     | Lt3                 | clayey loam                  | x                                      | heavily compacted, little artefacts to gravel                                                  |
| 410             | 540           | V       | II   | 3                          | 10YR 3/1     | Tu3                 | silty clay                   | x                                      | heavily compacted, little artefacts to gravel                                                  |
| 540             | 600           | VI      | III  | 4 - 5                      | 2,5y 5/2     | Ss (mSgSfS)         | medium, coarse and fine sand | -                                      | moderate compacted, no artefacts, clayey layers                                                |



**Table S21.** General information of core B6.

|                        |                             |
|------------------------|-----------------------------|
| <b>Profile number:</b> | <b>B6</b>                   |
| Date:                  | 07.10.2023                  |
| Processors:            | Philipp Garbe, Erik Lindner |
| Total length [m]:      | 6.00                        |
| Height asl [m]:        | 4.888                       |
| Coordinates [UTM]:     | 0358185 3382655             |
| Location:              | East of the Tell            |

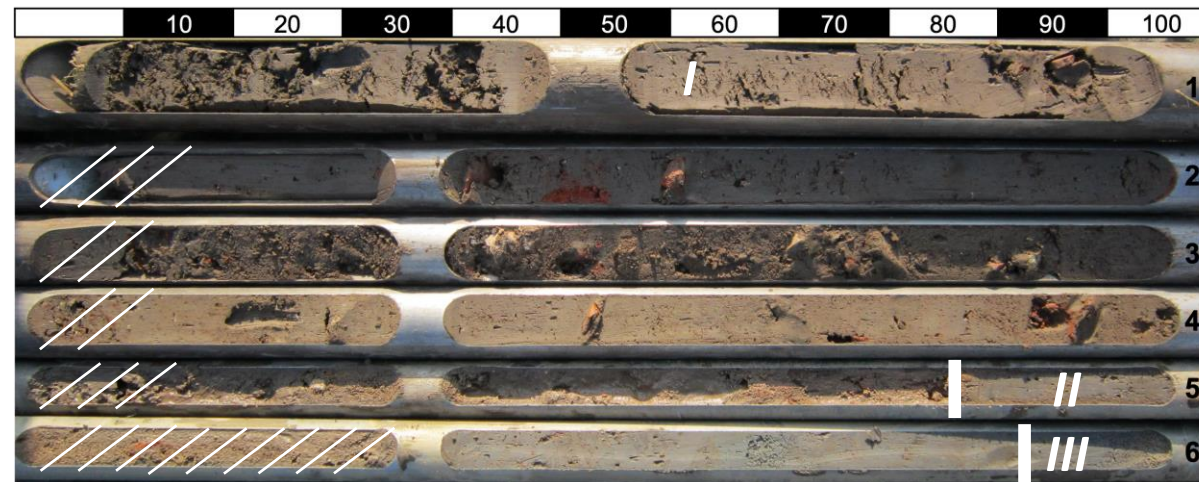

**Figure S13.** Core stratigraphy of B6 (see Figure S1 for legend).

**Table S22.** Detailed description of core B6.

| Depth from [cm] | Depth to [cm] | Horizon | Unit | Moisture (0 = dry, 5= wet) | Colour (dry) | Grain size (matrix) | Grain size (matrix)          | Cultural debris (x = present, - = not) | Remarks                                                                   |
|-----------------|---------------|---------|------|----------------------------|--------------|---------------------|------------------------------|----------------------------------------|---------------------------------------------------------------------------|
| 0               | 200           | I       | I    | 2                          | 2,5y 3/1     | Tu3                 | silty clay                   | x                                      | slightly compacted, plant remains, moderate artefacts to gravel           |
| 200             | 290           | II      | I    | 3                          | 2,5y 4/1     | Ls4                 | strongly sandy loam          | x                                      | heavily compacted, many artefacts to gravel, moderate limestone to gravel |
| 290             | 410           | III     | I    | 3                          | 2,5y 3/1     | Tl                  | loamy clay                   | x                                      | heavily compacted, moderate artefacts to gravel                           |
| 410             | 470           | IV      | I    | 4                          | 2,5y 3/2     | St2                 | slightly clayey sand         | x                                      | moderate compacted, little artefacts to gravel                            |
| 470             | 580           | V       | II   | 4                          | 2,5y 3/1     | Tl                  | loamy clay                   | -                                      | heavily compacted, no artefacts, sand lens at 550cm                       |
| 580             | 600           | VI      | III  | 4                          | 2,5y 3/2     | Ss (mSgSfS)         | medium, coarse and fine sand | -                                      | moderate compacted, no artefacts, clayey lenses                           |

**Table S23.** General information of core B7.

|                        |                             |
|------------------------|-----------------------------|
| <b>Profile number:</b> | <b>B7</b>                   |
| Date:                  | 07.10.2023                  |
| Processors:            | Philipp Garbe, Erik Lindner |
| Total length [m]:      | 7.00                        |
| Height asl [m]:        | 4.919                       |
| Coordinates [UTM]:     | 0358184 3382612             |
| Location:              | East of the Tell            |

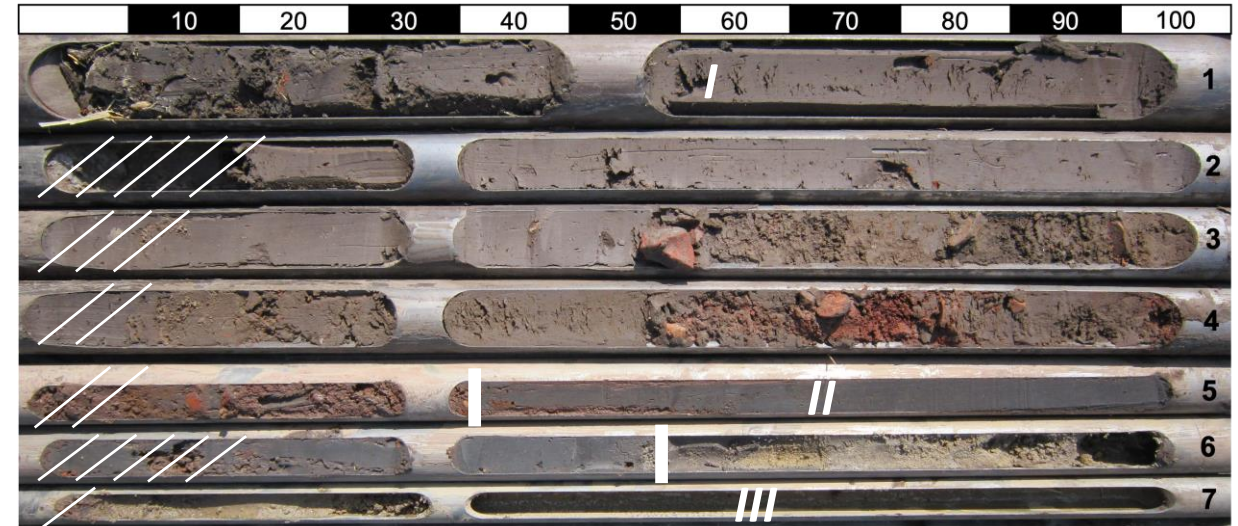

**Figure S14.** Core stratigraphy of B7 (see Figure S1 for legend).

**Table S24.** Detailed description of core B7.

| Depth from [cm] | Depth to [cm] | Horizon | Unit | Moisture (0 = dry, 5= wet) | Colour (dry) | Grain size (matrix) | Grain size (matrix)          | Cultural debris (x = present, - = not) | Remarks                                                       |
|-----------------|---------------|---------|------|----------------------------|--------------|---------------------|------------------------------|----------------------------------------|---------------------------------------------------------------|
| 0               | 240           | I       | I    | 2                          | 10YR 3/2     | Tu3                 | silty clay                   | x                                      | slightly compacted, plant remains, little artefacts to gravel |
| 240             | 380           | II      | I    | 3                          | 10YR 3/3     | Lu                  | silty loam                   | x                                      | heavily compacted, many artefacts to gravel                   |
| 380             | 430           | III     | I    | 3 - 4                      | 10YR 3/2     | Ls4                 | strongly sandy loam          | x                                      | heavily compacted, many artefacts to gravel                   |
| 430             | 540           | IV      | II   | 3 - 4                      | 10YR 2/2     | Tl                  | loamy clay                   | -                                      | heavily compacted, no artefacts                               |
| 540             | 700           | V       | III  | 5                          | 10YR 7/4     | Ss (mSgSfS)         | medium, coarse and fine sand | -                                      | moderate compacted, gravels, no artefacts, clayey lenses      |

**Table S25.** General information of core C1.

|                        |                            |
|------------------------|----------------------------|
| <b>Profile number:</b> | <b>C1</b>                  |
| Date:                  | 05.04.2023                 |
| Processors:            | Philipp Garbe, Martin Behl |
| Total length [m]:      | 6.50                       |
| Height asl [m]:        | 6.16                       |
| Coordinates [UTM]:     | 0358028 3382736            |
| Location:              | Eastern Tell               |

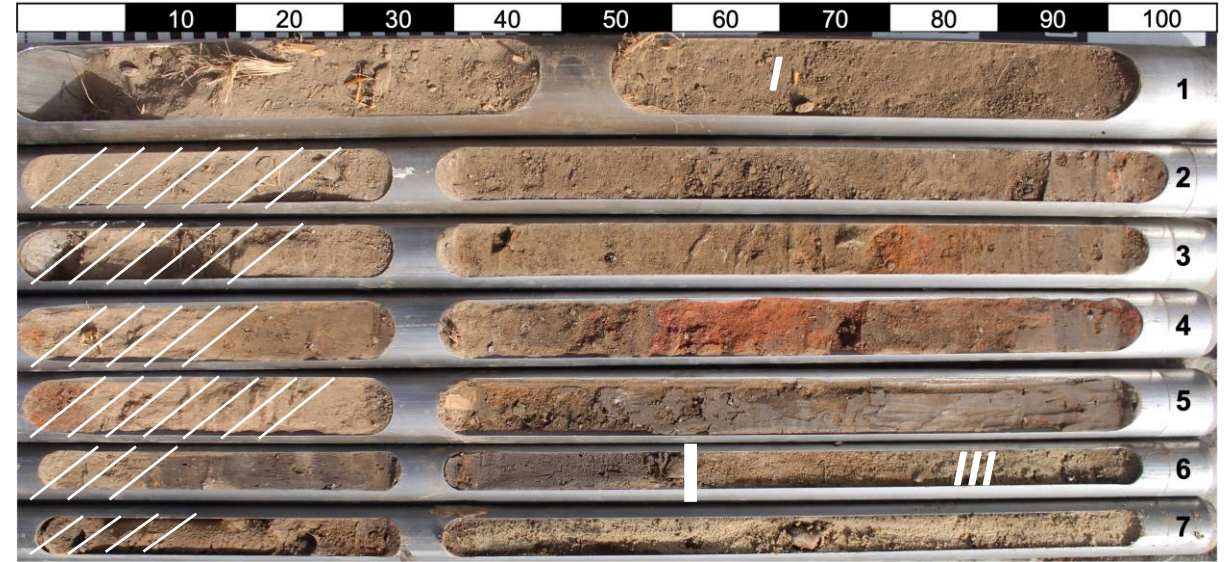

**Figure S15.** Core stratigraphy of C1 (see Figure S1 for legend).

**Table S26.** Detailed description of core C1.

| Depth from [cm] | Depth to [cm] | Horizon | Unit | Moisture (0 = dry, 5 = wet) | Colour (dry) | Grain size (matrix) | Grain size (matrix)          | Cultural debris (x = present, - = not) | Remarks                                                                  |
|-----------------|---------------|---------|------|-----------------------------|--------------|---------------------|------------------------------|----------------------------------------|--------------------------------------------------------------------------|
| 0               | 140           | I       | I    | 0                           | 10YR 4/4     | Uu                  | silty silt                   | x                                      | root remains, slightly compacted, moderate artefacts to gravel           |
| 140             | 350           | II      | I    | 0                           | 10YR 4/4     | Slu                 | loamy silty sand             | x                                      | heavily compacted, many artefacts to gravel                              |
| 350             | 380           | III     | I    | 1                           | 10YR 4/4     | Ls3                 | sandy loam                   | x                                      | heavily compacted, many artefacts to gravel, brick at 360cm              |
| 380             | 550           | IV      | I    | 2                           | 10YR 3/2     | Lt2                 | slightly clayey loam         | x                                      | heavily compacted, little artefacts to gravel, limestone fragments       |
| 550             | 650           | V       | III  | 3                           | 2,5y 5/3     | Ss(mSgSfS)          | medium, coarse and fine sand | -                                      | moderate compacted, gravel, no artefacts, clayey lenses at 580cm, Gezira |



**Table S27.** General information of core C2.

|                        |                             |
|------------------------|-----------------------------|
| <b>Profile number:</b> | <b>C2</b>                   |
| Date:                  | 02.10.2023                  |
| Processors:            | Philipp Garbe, Erik Lindner |
| Total length [m]:      | 7,00                        |
| Height asl [m]:        | 6,267                       |
| Coordinates [UTM]:     | 0358077 3382709             |
| Location:              | Eastern Tell                |

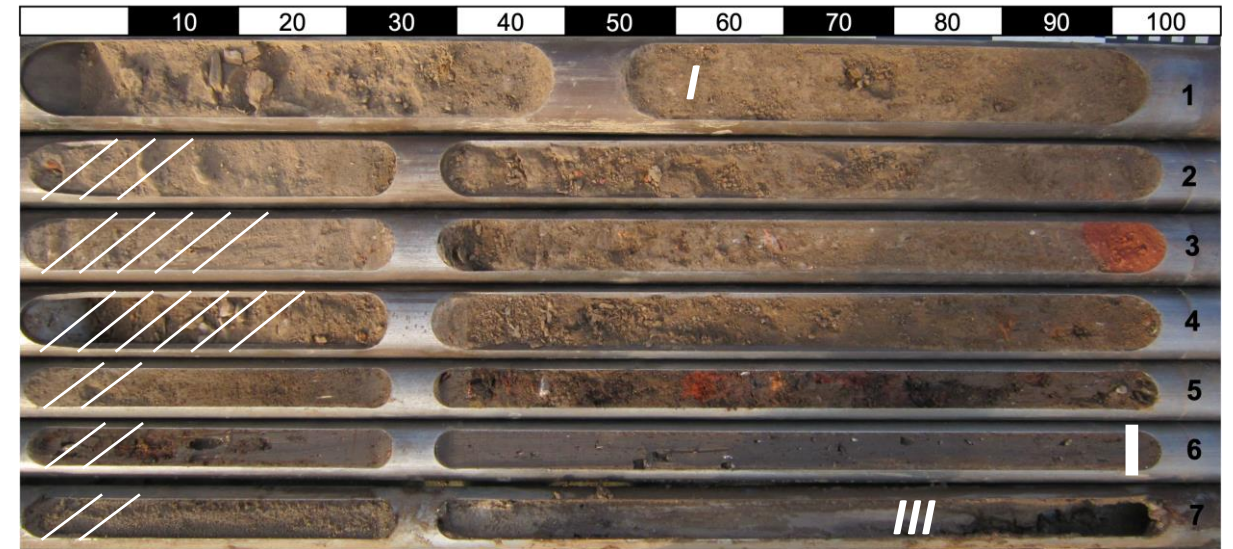

**Figure S16.** Core stratigraphy of C2 (see Figure S1 for legend).

**Table S28.** Detailed description of core C2.

| Depth from [cm] | Depth to [cm] | Horizon | Unit | Moisture (0 = dry, 5= wet) | Colour (dry) | Grain size (matrix) | Grain size (matrix)          | Cultural debris (x = present, - = not) | Remarks                                                                                                     |
|-----------------|---------------|---------|------|----------------------------|--------------|---------------------|------------------------------|----------------------------------------|-------------------------------------------------------------------------------------------------------------|
| 0               | 120           | I       | I    | 0                          | 10YR 4/4     | Uu                  | silty silt                   | x                                      | moderate compacted, plant remains, many artefacts to gravel                                                 |
| 120             | 260           | II      | I    | 1                          | 10YR 4/4     | Uls                 | loamy sandy silt             | x                                      | heavily compacted, moderate artefacts to gravel                                                             |
| 260             | 350           | III     | I    | 1                          | 10YR 5/4     | Slu                 | loamy silty sand             | x                                      | heavily compacted, many artefacts to gravel, brick at 290cm                                                 |
| 350             | 480           | IV      | I    | 1 - 2                      | 10YR 3/2     | Ls2                 | slightly sandy loam          | x                                      | heavily compacted, many artefacts to gravel, sand lens between 395-405cm, limestone at 440cm, clayey layers |
| 480             | 590           | V       | I    | 3                          | 10YR 3/2     | Lt3                 | clayey loam                  | -                                      | heavily compacted, many limestone to gravel, no artefacts                                                   |
| 590             | 700           | VI      | III  | 5                          | 10YR 5/2     | Ss (mSgSfS)         | medium, coarse and fine sand | -                                      | moderate compacted, no artefacts, gravel                                                                    |



**Table S29.** General information of core C3.

|                        |                              |
|------------------------|------------------------------|
| <b>Profile number:</b> | <b>C3</b>                    |
| Date:                  | 27.09.2023                   |
| Processors:            | Philipp Garbe, Julia Meister |
| Total length [m]:      | 8.00                         |
| Height asl [m]:        | 5.173                        |
| Coordinates [UTM]:     | 0358131 3382704              |
| Location:              | Eastern Tell                 |

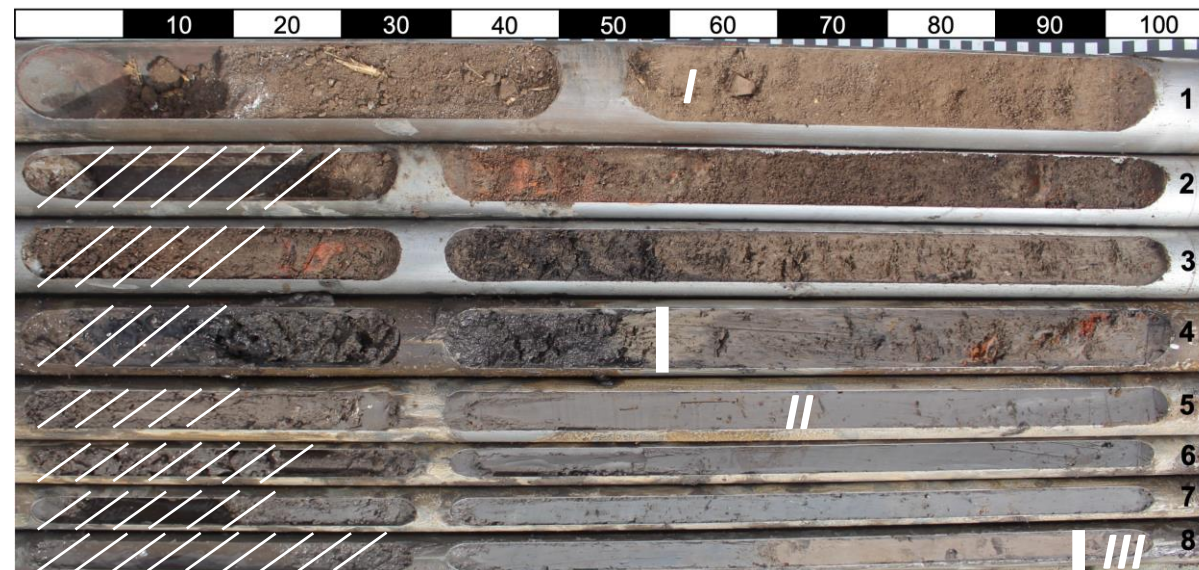

**Figure S17.** Core stratigraphy of C3 (see Figure S1 for legend).

**Table S30.** Detailed description of core C3.

| Depth from [cm] | Depth to [cm] | Horizon | Unit | Moisture (0 = dry, 5= wet) | Colour (dry) | Grain size (matrix) | Grain size (matrix)          | Cultural debris (x = present, - = not) | Remarks                                                                                                |
|-----------------|---------------|---------|------|----------------------------|--------------|---------------------|------------------------------|----------------------------------------|--------------------------------------------------------------------------------------------------------|
| 0               | 140           | I       | I    | 0 - 1                      | 10YR 3/6     | Us                  | sandy silt                   | x                                      | slightly compacted, little artefacts to gravel, plant remains, limestone to gravel                     |
| 140             | 250           | II      | I    | 1                          | 10YR 3/2     | Ls4                 | strongly sandy loam          | x                                      | heavily compacted, many artefacts to gravel, many organic 240-250cm                                    |
| 250             | 300           | III     | I    | 2 - 3                      | 10YR 3/2     | Lt3                 | clayey loam                  | x                                      | heavily compacted, little artefacts to gravel                                                          |
| 300             | 350           | IV      | I    | 5                          | 10YR 2/1     | St3                 | clayey sand                  | -                                      | moderate compacted, plant remains, artefacts in fragments, organic, "Faulschlamm"                      |
| 350             | 790           | V       | II   | 3                          | 10YR 3/1     | Tl                  | loamy clay                   | x                                      | heavily compacted, little artefacts to gravel, little limestone fragments, limestone between 520-530cm |
| 790             | 800           | VI      | III  | 4                          | 5y 7/2       | Ss (mSfSgS)         | medium, fine and coarse sand | -                                      | moderate compacted, no artefacts                                                                       |

**Table S31.** General information of core C4.

|                        |                             |
|------------------------|-----------------------------|
| <b>Profile number:</b> | <b>C4</b>                   |
| Date:                  | 01.10.2023                  |
| Processors:            | Philipp Garbe, Erik Lindner |
| Total length [m]:      | 8.00                        |
| Height asl [m]:        | 4.736                       |
| Coordinates [UTM]:     | 0358189 3382693             |
| Location:              | East of the Tell            |

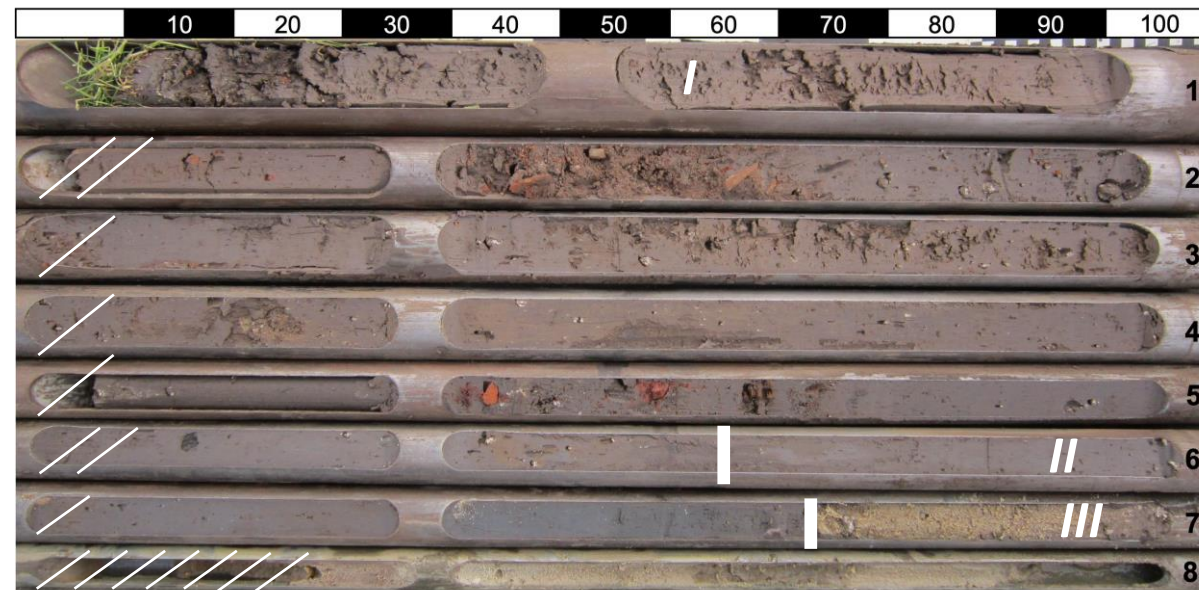

**Figure S18.** Core stratigraphy of C4 (see Figure S1 for legend).

**Table S32.** Detailed description of core C4.

| Depth from [cm] | Depth to [cm] | Horizon | Unit | Moisture (0 = dry, 5= wet) | Colour (dry) | Grain size (matrix) | Grain size (matrix)          | Cultural debris (x = present, - = not) | Remarks                                                                         |
|-----------------|---------------|---------|------|----------------------------|--------------|---------------------|------------------------------|----------------------------------------|---------------------------------------------------------------------------------|
| 0               | 130           | I       | I    | 2                          | 2,5y 2,5/1   | Tu4                 | strongly silty clay          | x                                      | moderate compacted, plant remains, many artefacts to gravel                     |
| 130             | 160           | II      | I    | 2                          | 2,5y 3/2     | Lts                 | clayey sandy loam            | x                                      | heavily compacted, very many artefacts to gravel                                |
| 160             | 550           | III     | I    | 3                          | 10YR 3/2     | Tl                  | loamy clay                   | x                                      | heavily compacted, moderate artefacts to gravel, many limestone to gravel       |
| 550             | 660           | IV      | II   | 3 - 4                      | 10YR 3/1     | Tu2                 | slightly silty clay          | -                                      | heavily compacted, little limestone fragments                                   |
| 660             | 800           | V       | III  | 5                          | 2,5y 6/3     | Ss (mSgSfS)         | medium, coarse and fine sand | -                                      | moderate compacted, many gravels, no artefacts, clayey layers between 690-700cm |

**Table S33.** General information of core C5.

|                        |                             |
|------------------------|-----------------------------|
| <b>Profile number:</b> | <b>C5</b>                   |
| Date:                  | 01.10.2023                  |
| Processors:            | Philipp Garbe, Erik Lindner |
| Total length [m]:      | 9.00                        |
| Height asl [m]:        | 4.809                       |
| Coordinates [UTM]:     | 0358232 3382693             |
| Location:              | East of theTell             |

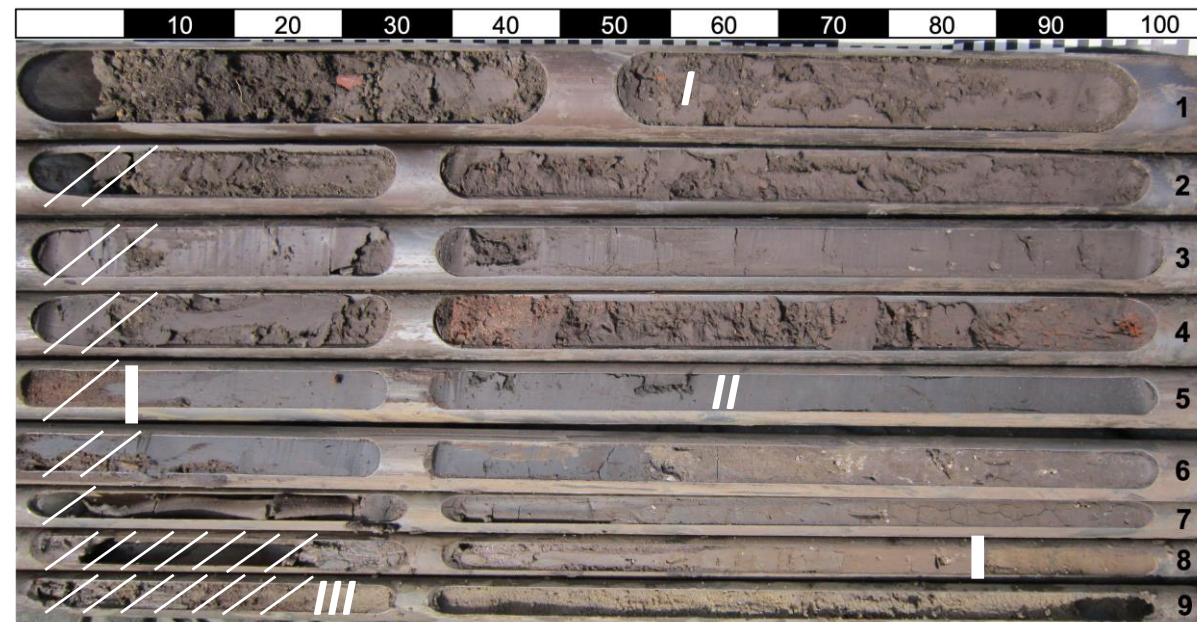

**Figure S19.** Core stratigraphy of C5 (see Figure S1 for legend).

**Table S34.** Detailed description of core C5.

| Depth from [cm] | Depth to [cm] | Horizon | Unit | Moisture (0 = dry, 5= wet) | Colour (dry) | Grain size (matrix) | Grain size (matrix)          | Cultural debris (x = present, - = not) | Remarks                                                                   |
|-----------------|---------------|---------|------|----------------------------|--------------|---------------------|------------------------------|----------------------------------------|---------------------------------------------------------------------------|
| 0               | 120           | I       | I    | 2                          | 10YR 3/2     | Tu4                 | strongly silty clay          | x                                      | moderate compacted, plant remains, little artefacts to gravel             |
| 120             | 320           | II      | I    | 2                          | 10YR 3/2     | Tu3                 | silty clay                   | x                                      | heavily compacted, very little artefacts to gravel                        |
| 320             | 400           | III     | I    | 2 - 3                      | 10YR 4/1     | Lt3                 | clayey loam                  | x                                      | heavily compacted, many artefacts to gravel, sand layer between 340-350cm |
| 400             | 550           | IV      | II   | 2 - 3                      | 2,5y 2,5/1   | TI                  | loamy clay                   | -                                      | heavily compacted, no artefacts                                           |
| 550             | 780           | V       | II   | 2 - 3                      | 2,5y 4/2     | TI                  | loamy clay                   | -                                      | heavily compacted, many limestone to gravel                               |
| 780             | 800           | VI      | III  | 2 - 3                      | 2,5y 5/4     | St3                 | clayey sand                  | -                                      | heavily compacted, no artefacts                                           |
| 800             | 900           | VII     | III  | 5                          | 2,5y 6/3     | Ss (mSgSfS)         | medium, coarse and fine sand | -                                      | moderate compacted, many gravels, no artefacts                            |



**Table S35.** General information of core D1.

|                        |                            |
|------------------------|----------------------------|
| <b>Profile number:</b> | <b>D1</b>                  |
| Date:                  | 05.04.2023                 |
| Processors:            | Philipp Garbe, Martin Behl |
| Total length [m]:      | 8.00                       |
| Height asl [m]:        | 6.217                      |
| Coordinates [UTM]:     | 0358052 3382806            |
| Location:              | Eastern Tell               |

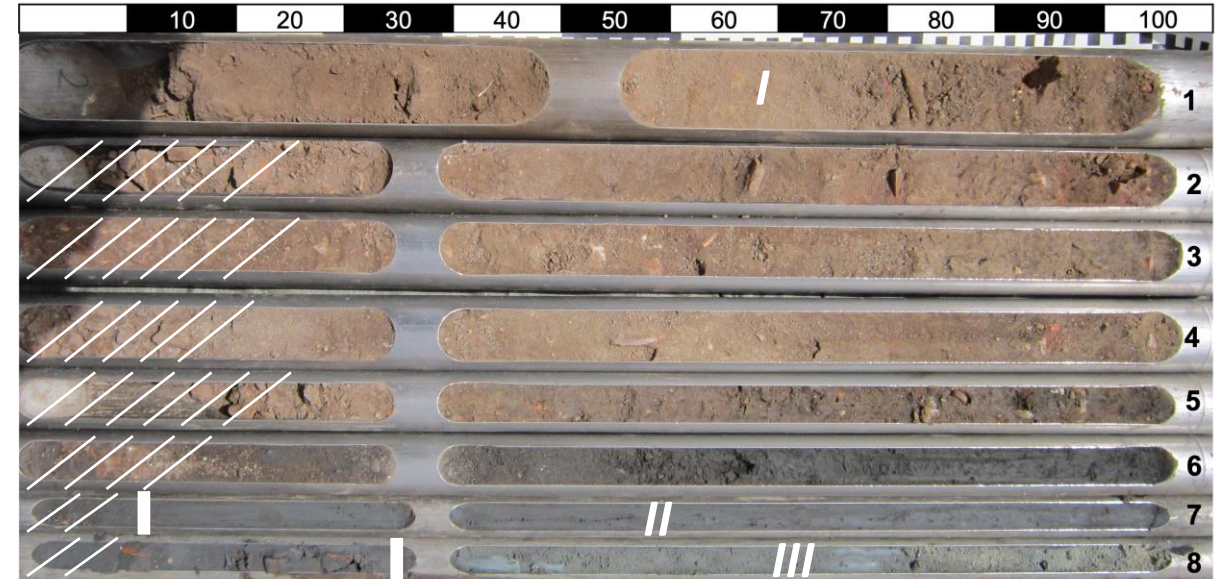

**Figure S20.** Core stratigraphy of D1 (see Figure S1 for legend).

**Table S36.** Detailed description of core D1.

| Depth from [cm] | Depth to [cm] | Horizon | Unit | Moisture (0 = dry, 5= wet) | Colour (dry) | Grain size (matrix) | Grain size (matrix)          | Cultural debris (x = present, - = not) | Remarks                                                                                           |
|-----------------|---------------|---------|------|----------------------------|--------------|---------------------|------------------------------|----------------------------------------|---------------------------------------------------------------------------------------------------|
| 0               | 230           | I       | I    | 0                          | 10YR 4/3     | U1s                 | loamy sandy silt             | x                                      | root remains, slightly compacted, many artefacts to gravel                                        |
| 230             | 340           | II      | I    | 1                          | 10YR 4/4     | Ut2                 | slightly clayey silt         | x                                      | heavily compacted, many artefacts to gravel, charcoal at 270cm                                    |
| 340             | 460           | III     | I    | 1                          | 10YR 3/2     | Ls2                 | slightly sandy loam          | x                                      | heavily compacted, many artefacts to gravel, sand lenses at 400cm                                 |
| 460             | 550           | IV      | I    | 2 - 3                      | 10YR 3/1     | Lt3                 | clayey loam                  | x                                      | heavily compacted, little artefacts to gravel                                                     |
| 550             | 600           | V       | I    | 3 - 4                      | 10YR 3/1     | Ts2                 | slightly sandy clay          | -                                      | heavily compacted, no artefacts                                                                   |
| 600             | 720           | VI      | II   | 3 - 4                      | 10YR 3/1     | Tu2                 | slightly silty clay          | x                                      | heavily compacted, little artefacts to gravel                                                     |
| 720             | 800           | VII     | III  | 4 - 5                      | 2,5y 5/1     | Ss(mSgSfS)          | medium, coarse and fine sand | -                                      | moderate compacted, no artefacts, until 760cm Geziraclay, at 760cm clayey, after 760cm Gezirasand |



**Table S37.** General information of core D2.

|                        |                            |
|------------------------|----------------------------|
| <b>Profile number:</b> | <b>D2</b>                  |
| Date:                  | 08.04.2023                 |
| Processors:            | Philipp Garbe, Martin Behl |
| Total length [m]:      | 7.00                       |
| Height asl [m]:        | 5.445                      |
| Coordinates [UTM]:     | 0358097 3382789            |
| Location:              | Eastern Tell               |

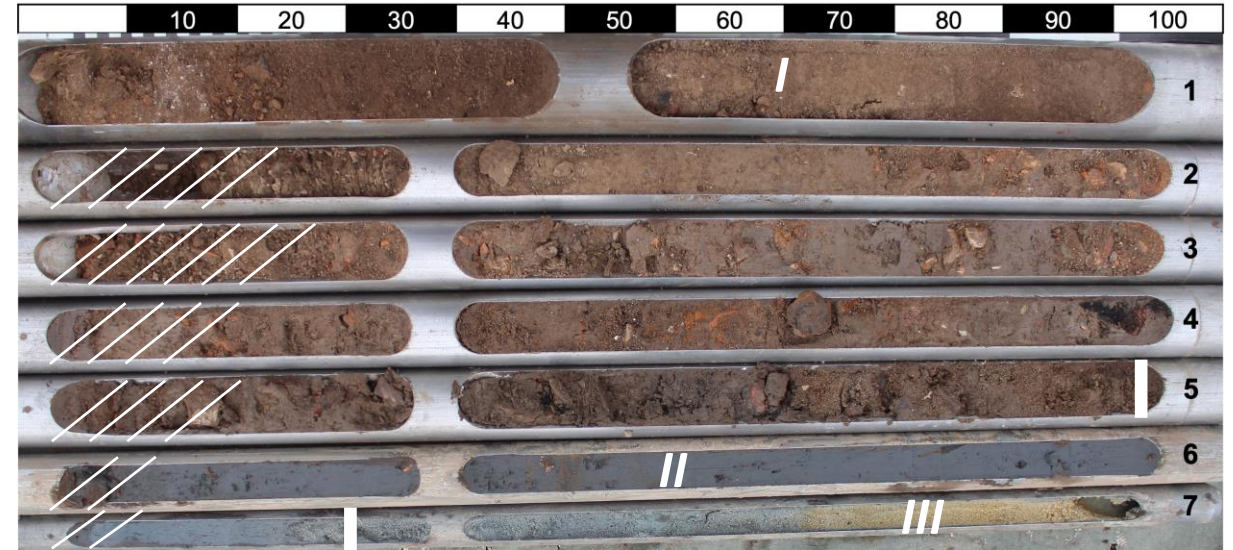

**Figure S21.** Core stratigraphy of D2 (see Figure S1 for legend).

**Table S38.** Detailed description of core D2.

| Depth from [cm] | Depth to [cm] | Horizon | Unit | Moisture (0 = dry, 5 = wet) | Colour (dry) | Grain size (matrix) | Grain size (matrix)          | Cultural debris (x = present, - = not) | Remarks                                                          |
|-----------------|---------------|---------|------|-----------------------------|--------------|---------------------|------------------------------|----------------------------------------|------------------------------------------------------------------|
| 0               | 160           | I       | I    | 1                           | 10YR 3/3     | Slu                 | loamy silty sand             | x                                      | root remains, slightly compacted, moderate artefacts to gravel   |
| 160             | 230           | II      | I    | 1                           | 10YR 4/2     | Sl3                 | loamy sand                   | x                                      | heavily compacted, very many artefacts to gravel                 |
| 230             | 350           | III     | I    | 1 - 2                       | 10YR 3/2     | Lt2                 | slightly clayey loam         | x                                      | heavily compacted, many artefacts to gravel, sand at 290-300cm   |
| 350             | 420           | IV      | I    | 2 - 3                       | 10YR 4/2     | Lt3                 | clayey loam                  | x                                      | heavily compacted, many artefacts to gravel                      |
| 420             | 460           | V       | I    | 3 - 4                       | 10YR 3/2     | Ts3                 | sandy clay                   | x                                      | heavily compacted, many artefacts to gravel                      |
| 460             | 500           | VI      | I    | 3 - 4                       | 10YR 3/3     | St3                 | clayey sand                  | x                                      | heavily compacted, many artefacts to gravel                      |
| 500             | 620           | VII     | II   | 4                           | 10YR 3/1     | Tu2                 | slightly silty clay          | -                                      | heavily compacted, no artefacts                                  |
| 620             | 700           | VIII    | III  | 5                           | 2,5y 5/1     | Ss(mSgSfS)          | medium, coarse and fine sand | -                                      | moderate compacted, Gezira, no artefacts, clayey lenses at 640cm |

**Table S39.** General information of core D3.

|                        |                              |
|------------------------|------------------------------|
| <b>Profile number:</b> | <b>D3</b>                    |
| Date:                  | 15.03.2023                   |
| Processors:            | Philipp Garbe, Julia Meister |
| Total length [m]:      | 8.00                         |
| Height asl [m]:        | 5.22                         |
| Coordinates [UTM]:     | 0358120 3382732              |
| Location:              | Eastern Tell                 |

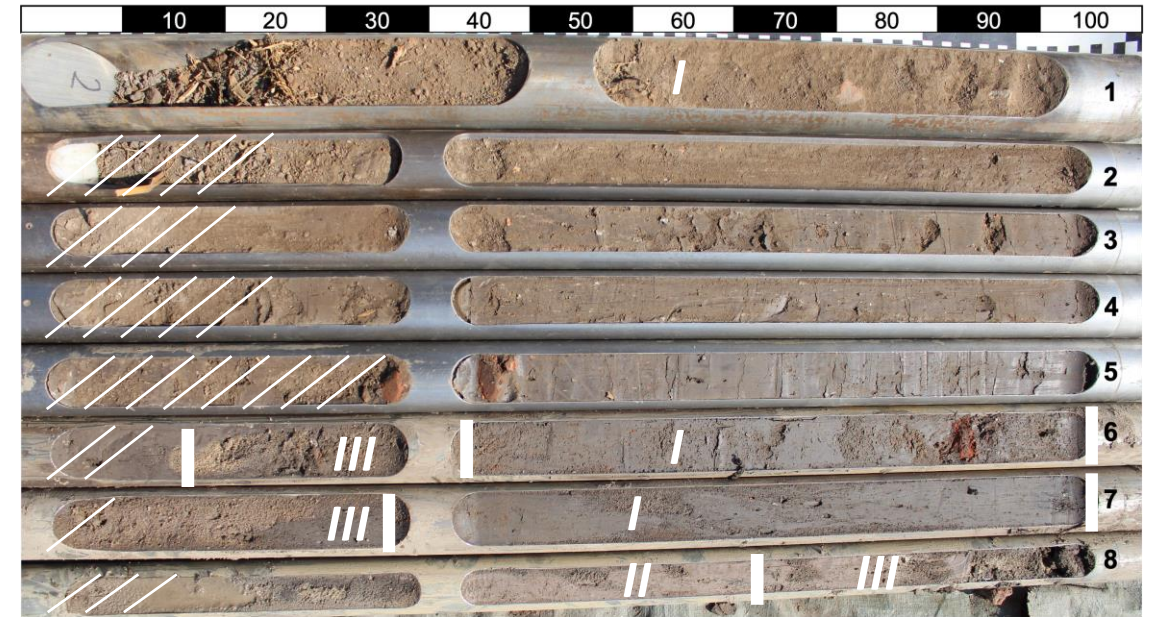

**Figure S22.** Core stratigraphy of D3 (see Figure S1 for legend).

**Table S40.** Detailed description of core D3.

| Depth from [cm] | Depth to [cm] | Horizon | Unit | Moisture (0 = dry, 5= wet) | Colour (dry) | Grain size (matrix) | Grain size (matrix)      | Cultural debris (x = present, - = not) | Remarks                                                                                  |
|-----------------|---------------|---------|------|----------------------------|--------------|---------------------|--------------------------|----------------------------------------|------------------------------------------------------------------------------------------|
| 0               | 160           | I       | I    | 0 - 1                      | 10YR 3/3     | Us                  | sandy silt               | x                                      | root remains, moderate compacted, many artefacts to gravel                               |
| 160             | 240           | II      | I    | 0 - 1                      | 10YR 3/3     | Ut2                 | slightly clayey silt     | x                                      | heavily compacted, moderate artefacts to gravel                                          |
| 240             | 420           | III     | I    | 1                          | 10YR 3/2     | Uls                 | loamy sandy silt         | x                                      | heavily compacted, little artefact fragments, many limestone fragementes                 |
| 420             | 510           | IV      | I    | 1 - 2                      | 10YR 3/2     | Ut3 - Lu            | clayey silt - silty loam | x                                      | heavily compacted, little artefact fragments, many artefacts at top, limestone fragments |
| 510             | 530           | V       | III  | 3 - 4                      | 10YR 4/2     | Ss(gSmS)            | coarse and medium sand   | x                                      | many artefact fragments                                                                  |
| 530             | 600           | VI      | I    | 2                          | 10YR 3/1     | Lt3                 | clayey loam              | x                                      | little artefact fragments, heavily compacted, big limestone at 580cm                     |
| 600             | 625           | VII     | III  | 5                          | 10YR 4/2     | Ss(gSmS)            | coarse and medium sand   | -                                      | moderate compacted, no artefacts                                                         |
| 625             | 700           | VIII    | I    | 2                          | 10YR 3/1     | Lt3                 | clayey loam              | x                                      | little artefact fragments, heavily compacted                                             |
| 700             | 760           | IX      | II   | 2                          | 10YR 4/2     | Lt3                 | clayey loam              | -                                      | heavily compacted, no artefacts, "Bilquas"                                               |
| 760             | 800           | X       | III  | 4                          | 2,5YR 6/2    | Ss(mSgS)            | medium and coarse sand   | -                                      | moderate compacted, no artefacts                                                         |



## Supplementary Material S2

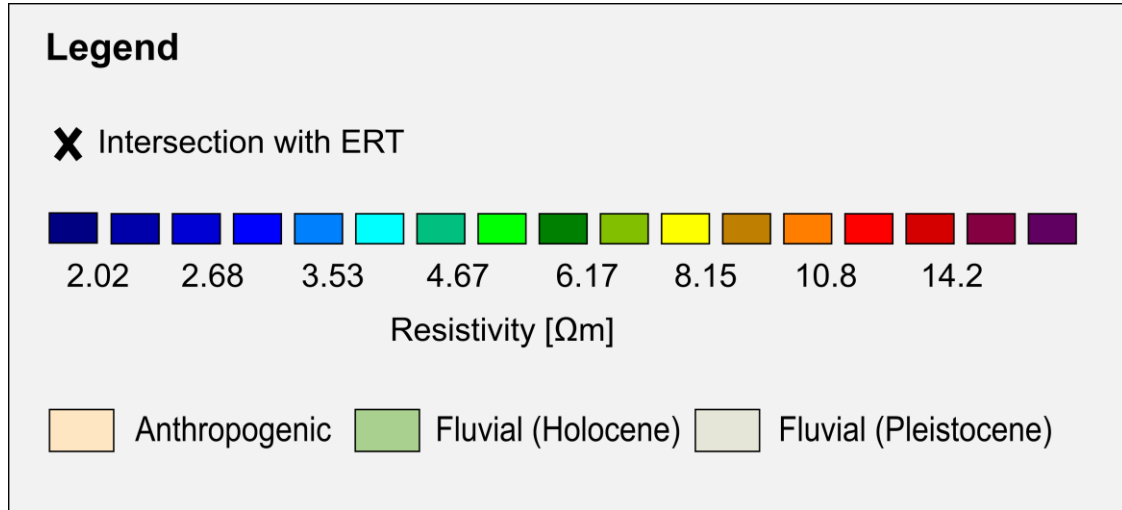

**Figure S23.** Legend for ERT tomograms.

**Figure S24.** Overview of drilling locations and ERT profiles (only the solid ERT lines are used for the interpretation and discussion in the article).

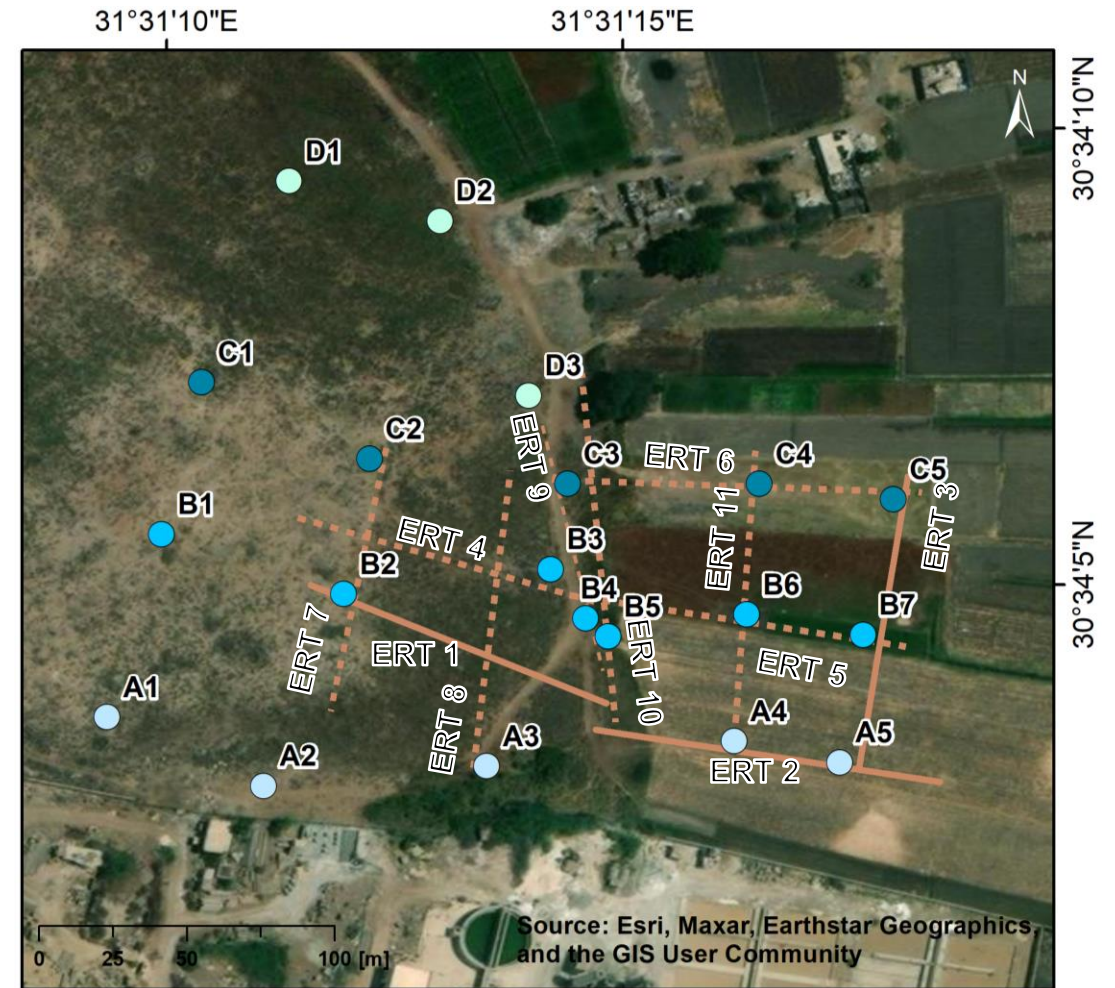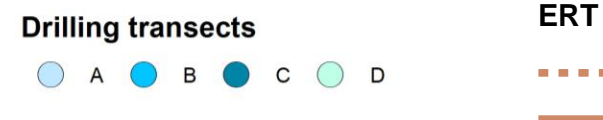



## ERT 1

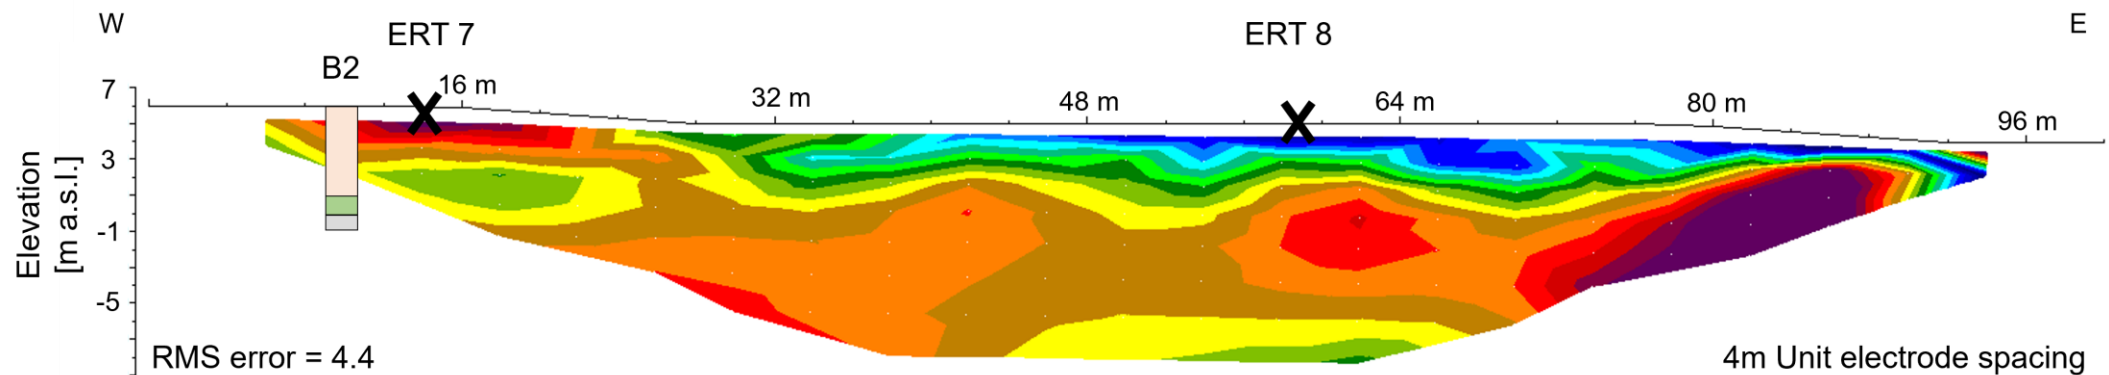

**Figure S25.** Electrical resistivity tomogram ERT 1 (see Figure S23 for legend).

## ERT 2

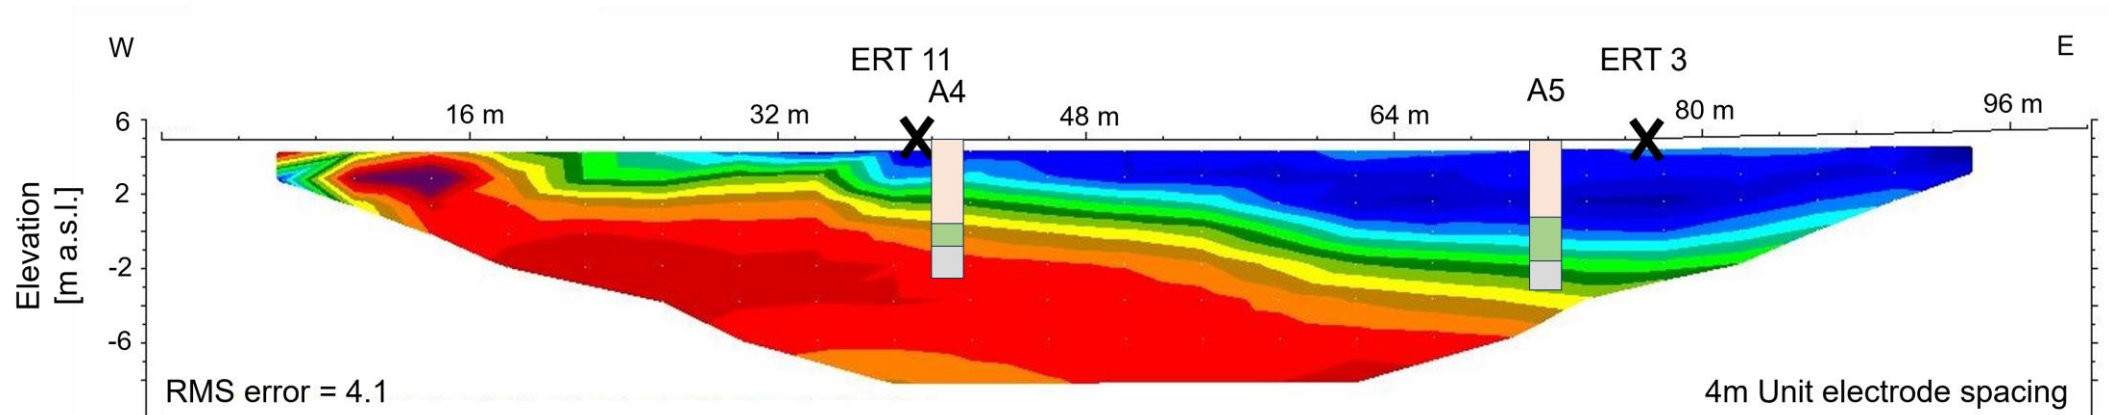

**Figure S26.** Electrical resistivity tomogram ERT 2 (see Figure S23 for legend).

## ERT 3

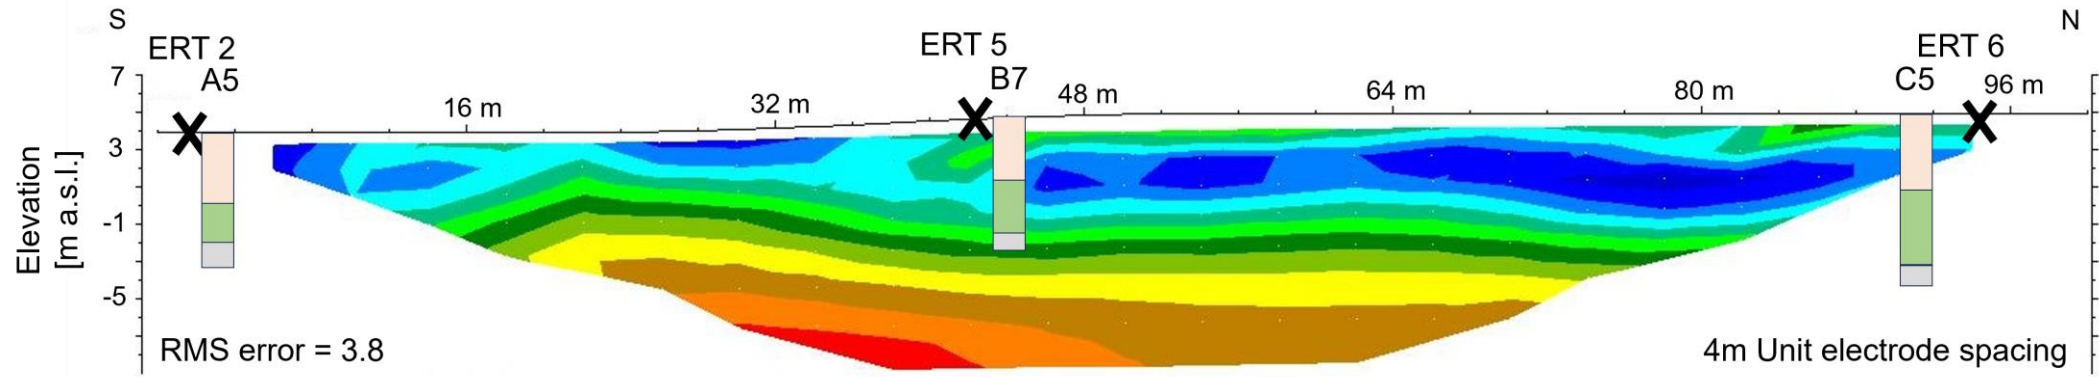

Figure S27. Electrical resistivity tomogram ERT 3 (see Figure S23 for legend).

## ERT 4

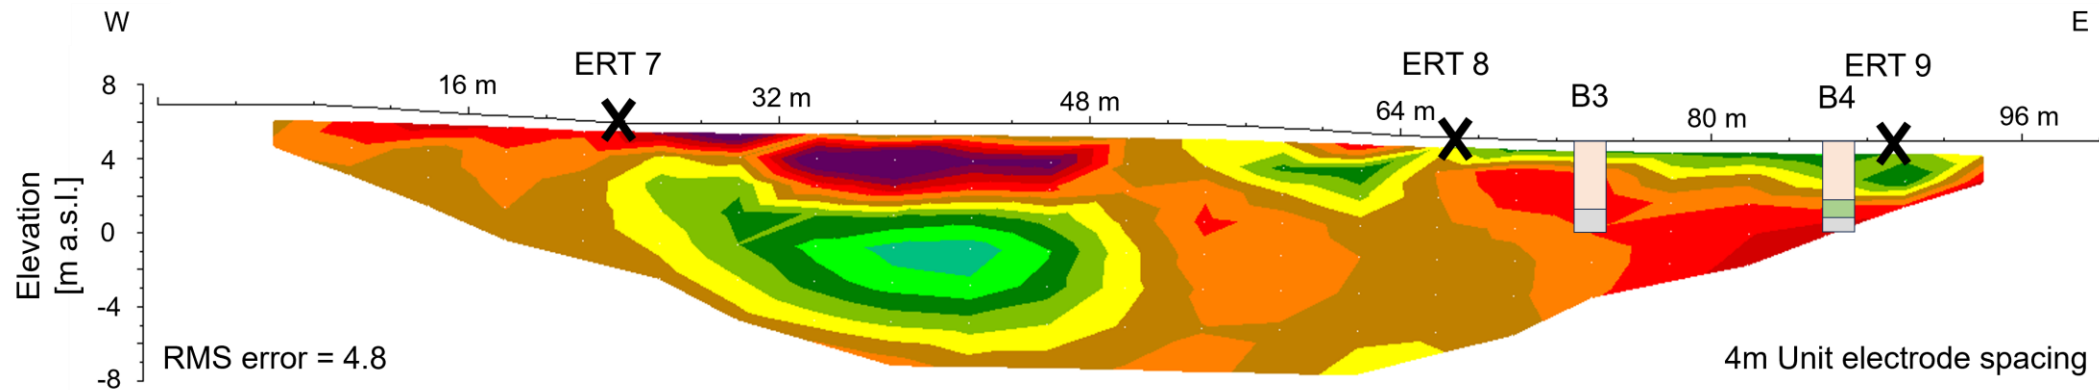

Figure S28. Electrical resistivity tomogram ERT 4 (see Figure S23 for legend).

## ERT 5

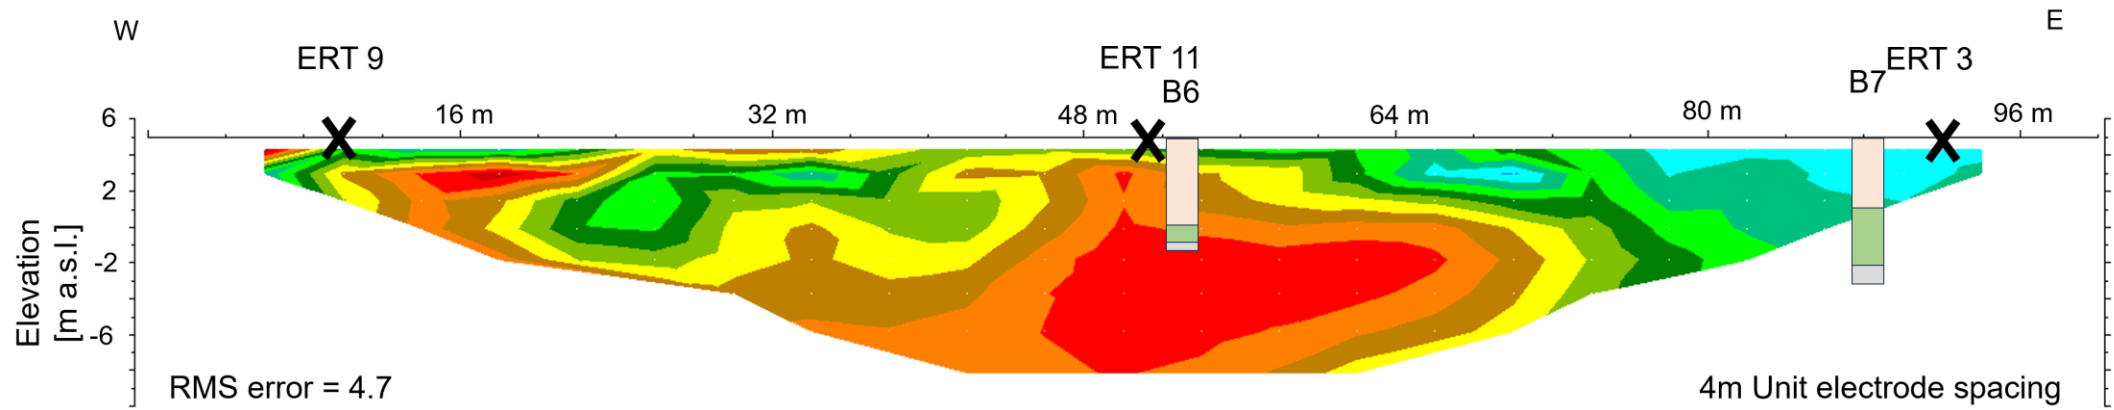

Figure S29. Electrical resistivity tomogram ERT 5 (see Figure S23 for legend).

## ERT 6

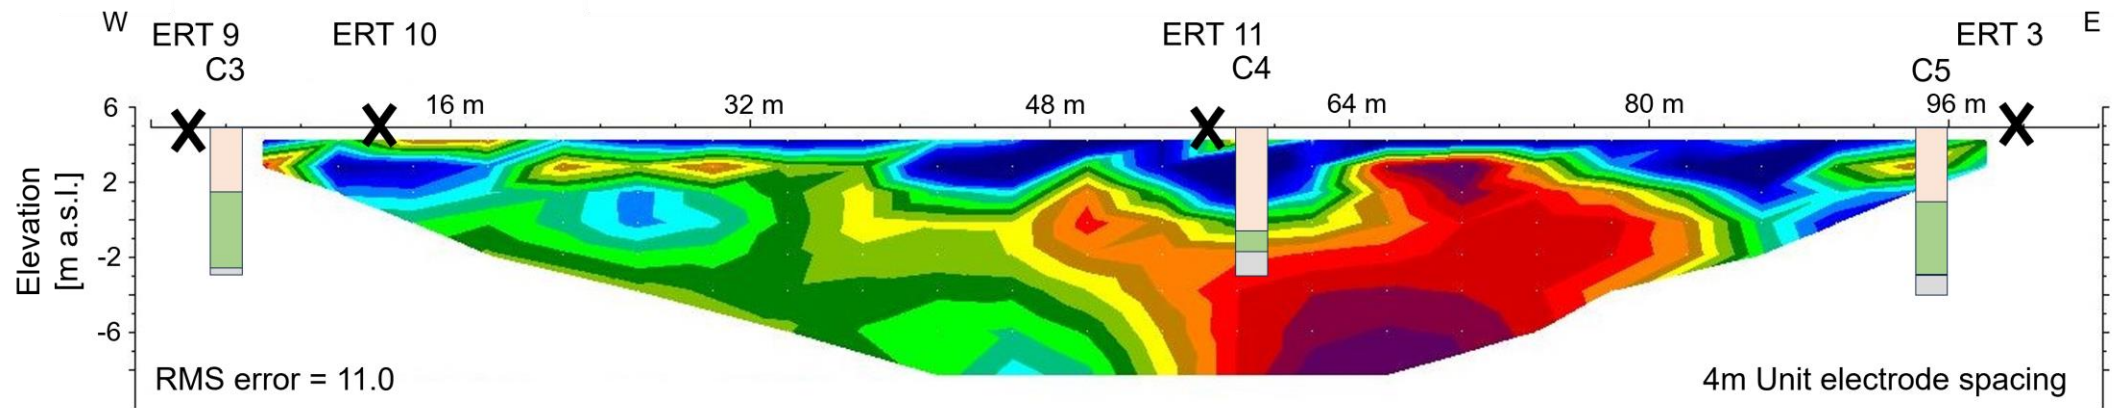

Figure S30. Electrical resistivity tomogram ERT 6 (see Figure S23 for legend).



## ERT 7

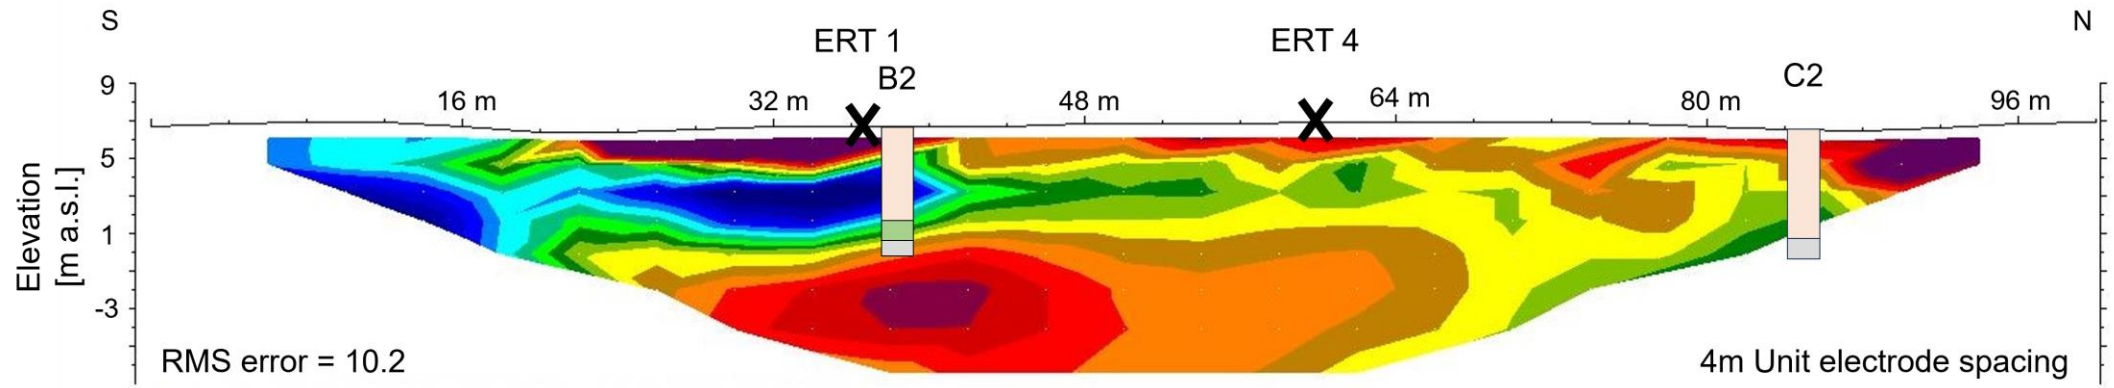

Figure S31. Electrical resistivity tomogram ERT 7 (see Figure S23 for legend).

## ERT 8

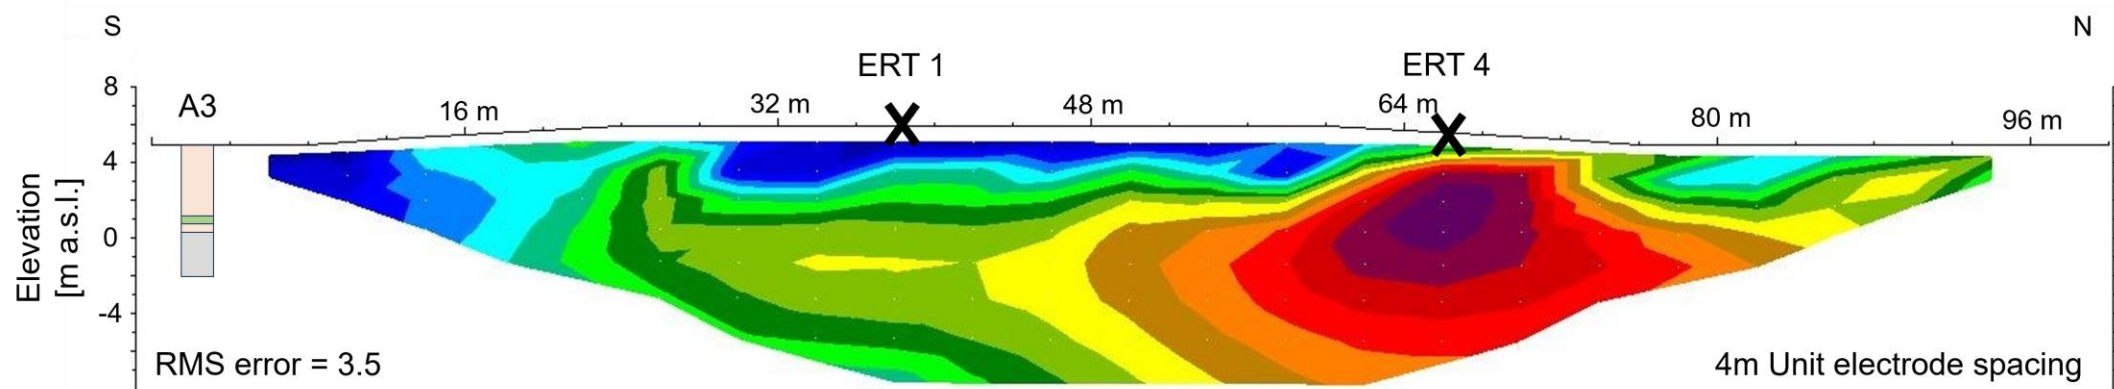

Figure S32. Electrical resistivity tomogram ERT 8 (see Figure S23 for legend).

## ERT 9

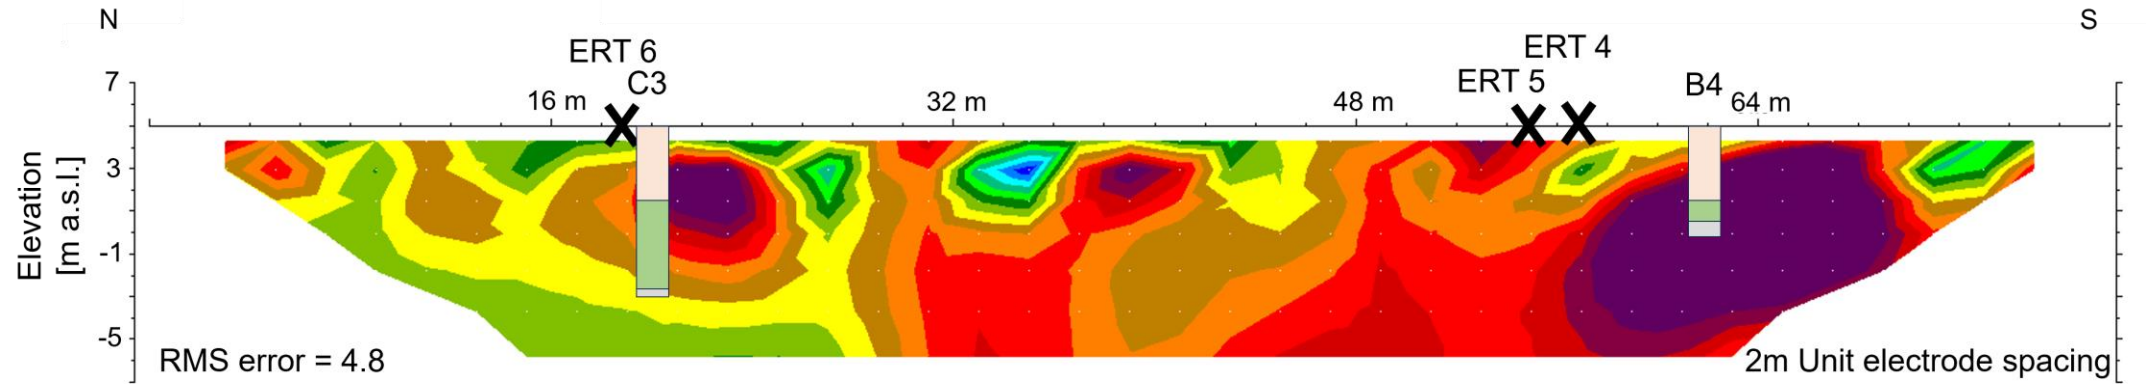

**Figure S33.** Electrical resistivity tomogram ERT 9 (see Figure S23 for legend).

## ERT 10

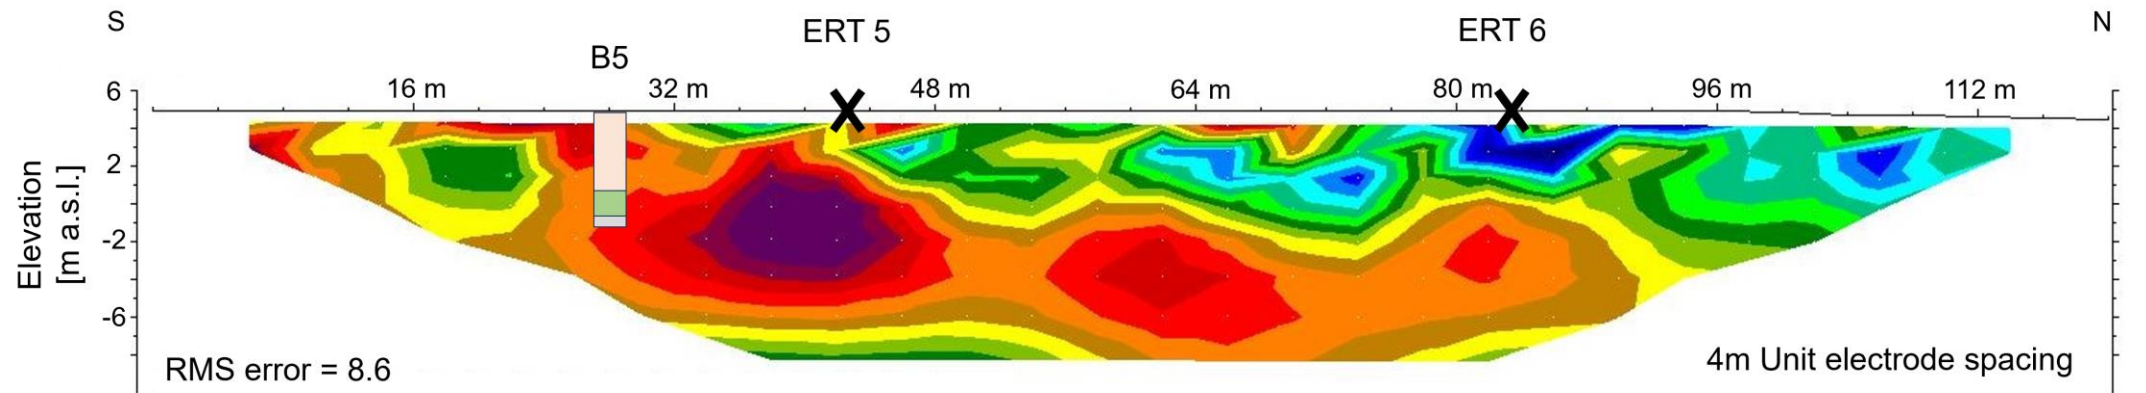

**Figure S34.** Electrical resistivity tomogram ERT 10 (see Figure S23 for legend).

# ERT 11

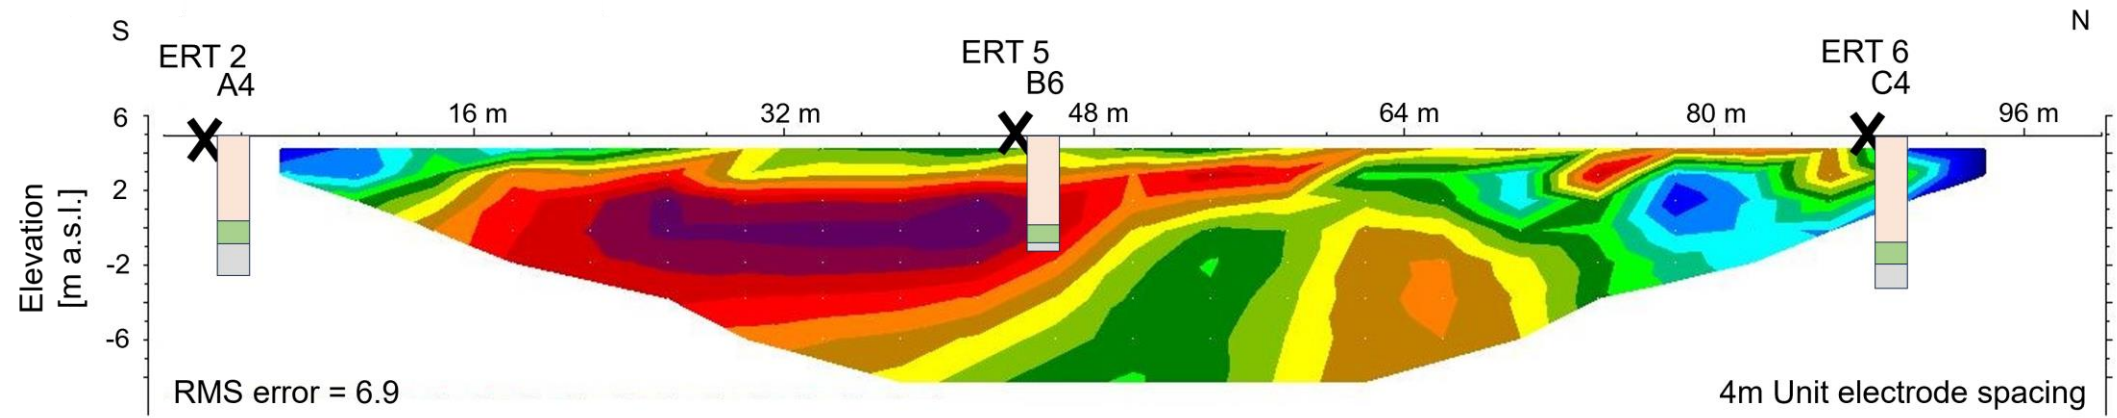

**Figure S35.** Electrical resistivity tomogram ERT 11 (see Figure S23 for legend).
